1 **Coral reef carbonate budgets and ecological drivers in the naturally high**  
2 **temperature and high alkalinity environment of the Red Sea**

3

4 Anna Roik<sup>1</sup>, Till Röthig<sup>1</sup>, Claudia Pogoreutz<sup>1</sup>, Christian R. Voolstra<sup>1,\*</sup>

5

6 <sup>1</sup>Red Sea Research Center, King Abdullah University of Science and Technology, Thuwal, Saudi  
7 Arabia

8

9 \*Corresponding author

10

11 Short title: Red Sea coral reef carbonate budget

12

13 Keywords: diel pH - total alkalinity - Red Sea - coral reef accretion - calcification - bioerosion -  
14 inorganic nutrients - environmental drivers

## 15 **Abstract**

16 The coral structural framework is crucial for maintaining reef ecosystem function and services.  
17 In the central Red Sea, a naturally high alkalinity is beneficial to reef growth, but rising water  
18 temperatures impair the calcification capacity of reef-building organisms. However, it is  
19 currently unknown how beneficial and detrimental factors affect the balance between  
20 calcification and erosion, and thereby the overall growth of the reef framework. To provide  
21 insight into present-day carbonate budgets and reef growth dynamics in the central Red Sea, we  
22 measured *in situ* net-accretion and net-erosion rates ( $G_{\text{net}}$ ) by deployment of limestone blocks  
23 and estimated census-based carbonate budgets ( $G_{\text{budget}}$ ) in four reef sites along a cross-shelf  
24 gradient (25 km). We assessed abiotic variables (i.e., temperature, inorganic nutrients, and  
25 carbonate system variables) and biotic drivers (i.e., calcifier and bioeroder abundances). On  
26 average, total alkalinity  $A_T$  (2346 – 2431  $\mu\text{mol kg}^{-1}$ ), aragonite saturation state (4.5 - 5.2  $\Omega_a$ ), and  
27  $\text{pCO}_2$  (283 -315  $\mu\text{atm}$ ) were close to estimates of pre-industrial global ocean surface waters.  
28 Despite these calcification-favorable carbonate system conditions,  $G_{\text{net}}$  and  $G_{\text{budget}}$  encompassed  
29 positive (offshore) and negative net-production (midshore-lagoon and exposed nearshore site)  
30 estimates. Notably,  $G_{\text{budget}}$  maxima were lower compared to reef growth from pristine Indian  
31 Ocean sites. Yet, a comparison with historical data from the northern Red Sea suggests that  
32 overall reef growth in the Red Sea has likely remained similar since 1995. When assessing sites  
33 across the shelf gradient,  $A_T$  correlated well with reef growth rates ( $\rho = 0.89$ ), while temperature  
34 was a weaker, negative correlate ( $\rho = -0.71$ ). Further,  $A_T$  explained about 65 % of  $G_{\text{budget}}$  in a best  
35 fitting distance-based linear model. Interestingly, parrotfish abundances added up to 82% of  
36 explained variation, further substantiating recent studies highlighting the importance of  
37 parrotfish to reef ecosystem function. Our study provides a baseline that will be particularly  
38 useful in assessing future trajectories of reef growth capacities in the Red Sea under continuous  
39 ocean warming and acidification.

## 40 Introduction

41  
42 Coral reef growth is limited to warm, aragonite-saturated, and oligotrophic tropical oceans and is  
43 pivotal for coral reef functioning (Buddemeier, 1997; Kleypas et al., 1999). The coral reef  
44 framework not only maintains a remarkable biodiversity, but also provides highly valuable  
45 ecosystem services that include food supply and coastal protection, among others (Moberg and  
46 Folke, 1999; Reaka-Kudla, 1997). Biogenic calcification, erosion, and dissolution cumulatively  
47 contribute to the formation of the reef framework constructed of calcium carbonate ( $\text{CaCO}_3$ ,  
48 mainly aragonite) (Glynn, 1997; Perry et al., 2008). The balance of carbonate loss and accretion  
49 are controlled by abiotic and biotic factors: temperature, properties of carbonate chemistry (e.g.  
50 pH, total alkalinity  $A_T$ , and aragonite saturation state  $\Omega_a$ ), calcifying benthic communities  
51 (scleractinian corals and coralline algal crusts), as well as grazing and endolithic bioeroders (e.g.  
52 parrotfish, sea urchins, and boring sponges) (Glynn and Manzello, 2015; Kleypas et al., 2001).

53  
54 Positive carbonate budgets ( $G_{\text{budget}}$ ) are maintained when reef calcification produces more  $\text{CaCO}_3$   
55 than is being removed, and rely in a great part on the ability of benthic calcifiers to precipitate  
56 calcium carbonate from seawater ( $\text{Ca}^{2+} + \text{CO}_3^{2-} \leftrightarrow \text{CaCO}_3$ , Tambutté et al. 2011). Calcification  
57 rates increase with higher temperature, but have an upper thermal limit (Jokiel and Coles, 1990;  
58 Marshall and Clode, 2004). In addition,  $A_T$  and  $\Omega_a$  are measures for the availability of the  
59 carbonate ions in seawater and their tendency to precipitate. Both positively correlate with  
60 calcification rates (Marubini et al., 2008; Schneider and Erez, 2006). Today's oceans are  
61 warming, which poses a potential threat to calcifying reef organisms, as high temperatures begin  
62 to exceed the thermal optima of calcifying organisms and thereby slowing down calcification  
63 (Carricart-Ganivet et al., 2012; Death et al., 2009). Simultaneously, as ocean acidification is  
64 commonly manifested in a decrease in ocean's pH and hence a decrease of  $\Omega_a$  (Orr et al., 2005),  
65 calcification becomes energetically more costly (Cai et al., 2016; Cohen and Holcomb, 2009;  
66 Waldbusser et al., 2016). Finally, ocean acidification stimulates destructive processes, e.g. the  
67 proliferation and erosive activity of endolithic organisms that counteract reef growth (Enochs,  
68 2015; Fang et al., 2013; Tribollet et al., 2009). A low or negative  $G_{\text{budget}}$  is generally associated  
69 with a disturbance of abiotic conditions that naturally have supported coral reef growth over the  
70 past millennia, i.e. specific temperature range, nutrient level, pH, and  $\Omega_a$  (Buddemeier, 1997;

71 Kleypas et al., 1999). Today, in most tropical coral reefs, negative  $G_{\text{budget}}$  are a hallmark of reef  
72 degradation due to an increased intensity or frequency of extreme climate events (Eakin, 2001;  
73 Schuhmacher et al., 2005) or local human impacts, such as pollution and eutrophication  
74 (Chazottes et al., 2002; Edinger et al., 2000).

75  
76 A census-based  $G_{\text{budget}}$  approach is a powerful tool to assess reef persistence of the reef  
77 framework allowing for a regional and global comparison of coral reef ecosystems (Kennedy et  
78 al., 2013; Perry et al., 2012, 2015). In more recent years,  $G_{\text{budget}}$  studies revealed that coral reef  
79 growth in the Caribbean has decreased by 50%, compared to historical mid- to late-Holocene  
80 reef growth. Also, 37% of all reefs studied are reported to be in a net-erosional state (Perry et al.,  
81 2013). In the Red Sea, coral reefs are exposed to challenging conditions in terms of high  
82 temperature and salinity regimes (Kleypas et al., 1999). Despite its high temperature and high  
83 salinity conditions (Roik et al., 2016), the Red Sea supports remarkable reef ecosystems with a  
84 coral reef framework along its entire coastline (Riegl et al., 2012). But coral core samples  
85 indicate that calcification rates have already been declining over the past decades worldwide, at  
86 the Great Barrier reef, the Caribbean, and also the central Red Sea. This decline in coral growth  
87 is widely attributed to ocean warming (Bak et al., 2009; Cantin et al., 2010; Cooper et al., 2008).  
88 In the central and southern Red Sea, present-day data show reduced calcification rates of corals  
89 and calcifying crusts when temperatures peak during summer (Roik et al., 2015; Sawall et al.,  
90 2015). While increasing temperatures are seemingly stressful and energetically demanding for  
91 calcifiers, high  $A_T$  values ( $\sim 2400 \mu\text{mol kg}^{-1}$ , Metzl et al. 1989) in the Red Sea are putatively  
92 beneficial for carbonate accretion (Tambutté et al., 2011).

93  
94 It is yet unknown how these present-day stressors and positive drivers of reef growth influence  
95 the overall reef net-carbonate production in this region. Availability of  $G_{\text{budget}}$  data for Red Sea  
96 coral reefs is poor (Jones et al., 2015). Aside from one early census-based assessment of the  
97  $G_{\text{budget}}$  for a high-latitude reef in the Gulf of Aqaba (northern Red Sea), which considered both  
98 calcification and erosion/dissolution rates (Dullo et al., 1996), the remaining studies report  
99 calcification rates only (Cantin et al., 2010; Heiss, 1995; Roik et al., 2015; Sawall and Al-  
100 Sofyani, 2015). In this study we therefore set out to assess abiotic and biotic drivers of reef  
101 growth, and to determine the  $G_{\text{budget}}$  for coral reefs of the central Red Sea. First, to reveal the

102 present-day carbonate chemistry in the region, we examined sites along an environmental cross-  
103 shelf gradient during winter and summer. Second, we followed the census-based *ReefBudget*  
104 approach (Perry et al., 2012) to estimate net carbonate production states ( $G_{\text{budget}}$ ) using reef site-  
105 specific biotic parameters. To achieve this, we assessed the abundances and calcification rates of  
106 the major reef-building coral taxa (*Porites*, *Pocillopora*, and *Acropora*) and calcareous crusts,  
107 along with the abundances and erosion rates of external macro bioeroders (parrotfish and sea  
108 urchins). Also, we measured net-accretion/erosion rates ( $G_{\text{net}}$ ) *in situ* using limestone blocks  
109 deployed in the reefs, which additionally capture endolithic erosion rates. Finally, we explore the  
110 correlations of potential drivers on  $G_{\text{net}}$  and the overall  $G_{\text{budgets}}$  using the abiotic and biotic data.  
111 Our study provides insight into reef growth dynamics and a comparative baseline to assess the  
112 effects of ongoing environmental change on reef growth in the central Red Sea.

## 113 **Materials and Methods**

114

### 115 **Study sites and environmental monitoring**

116 Study sites were located in the Saudi Arabian central Red Sea along an environmental cross-shelf  
117 gradient, which was previously described in (Roik et al., 2016) and Roik et al. (2015). Briefly,  
118 along this gradient dissolved oxygen increases, but chlorophyll-a, turbidity, and sedimentation  
119 decrease from nearshore to offshore, and are subject to seasonal variation (Roik et al., 2016).  
120 Data for this study were collected at four sites: an offshore forereef at ~25 km distance from the  
121 coastline (22° 20.456 N, 38° 51.127 E, “Shi’b Nazar”), two midshore sites (forereef and lagoon)  
122 at ~10 km distance (22° 15.100 N, 38° 57.386 E, “Al Fahal”), and a nearshore forereef at ~3km  
123 distance (22° 13.974 N, 39° 01.760 E, “Inner Fsar”). All sampling stations were located between  
124 7.5 and 9 m depth. In the following, reef sites are referred to as “offshore”, “midshore”,  
125 “midshore lagoon”, and “nearshore”, respectively. Abiotic variables were measured in the study  
126 sites during two seasons in 2014. Temperature and pH were measured continuously recorded  
127 during “winter” (10<sup>th</sup> February – 6<sup>th</sup> April 2014) and “summer” (20<sup>th</sup> June – 20<sup>th</sup> September  
128 2014) (see Roik et al., 2016). Additionally, for 5 – 6 consecutive weeks during each of the  
129 seasons, seawater samples were collected on SCUBA at the stations for the determination of  
130 inorganic nutrients and carbonate chemistry: nitrate and nitrite (NO<sub>3</sub><sup>-</sup>&NO<sub>2</sub><sup>-</sup>), ammonia (NH<sub>4</sub><sup>+</sup>),  
131 phosphate (PO<sub>4</sub><sup>3-</sup>), total alkalinity (A<sub>T</sub>), and pH (Table S1).

132

### 133 **Abiotic parameters - Continuous data**

134 Conductivity-Temperature-Depth loggers (CTDs, SBE 16plusV2 SEACAT, RS-232, Sea-Bird  
135 Electronics, Bellevue, WA, USA) equipped with pH probes (SBE 18/27, Sea-Bird) were  
136 deployed at 0.5 m above the reef to collect times series data of temperature and pH<sub>CTD</sub> at hourly  
137 intervals. Both sensors were factory-calibrated. To control for drift, pH probes were tested before  
138 and after deployment using certified standard buffers (pH-7 “38746” and pH-10 “38749”, Fluka  
139 Analytics, Sigma-Aldrich, Germany). Data corrections were applied if necessary.

140

### 141 **Abiotic parameters - Seawater samples**

142 Seawater samples were collected on SCUBA at each of the stations using 4 L cubitainers (Table  
143 S1). Simultaneously, 60 mL seawater samples were taken over a 0.45 µm syringe filter for A<sub>T</sub>

144 measurements. Immediately after sampling, the pH of the seawater ( $\text{pH}_{\text{SWS}}$ ) was measured in  
145 subsamples using a portable pH probe with an integrated temperature sensor ( $n = 3$ , precision of  
146  $\pm 0.05$  pH units, Orion 4 Star Plus, Thermo Fisher Scientific, MA, USA). Before each sampling  
147 day, the probe was calibrated using certified standard buffers (pH-4 “38743,” pH-7 “38746” and  
148 pH-10 “38749”, Fluka Analyticals, Sigma-Aldrich). Seawater samples for inorganic nutrient  
149 analyses and  $A_T$  measurement were transported on ice in the dark and were processed on the  
150 same day. Samples were filtered over GF/F filters ( $0.7 \mu\text{m}$ , Whatman, UK) and filtrates were  
151 frozen at  $-20 \text{ }^\circ\text{C}$  until analysis. The inorganic nutrient content ( $\text{NO}_3^-$  &  $\text{NO}_2^-$ ,  $\text{NH}_4^+$ , and  $\text{PO}_4^{3-}$ )  
152 was determined using standard colorimetric tests and a Quick-Chem 8000 AutoAnalyzer  
153 (Zellweger Analysis, Inc.).  $A_T$  samples were analyzed within 2 – 4 h after collection using an  
154 automated acidimetric titration system (Titrand 888, Metrohm AG, Switzerland). Gran-type  
155 titrations were performed with a 0.01 M HCl certified standard solution (prepared from 0.1 HCl,  
156 Fluka Analyticals) at a precision of  $\pm 9 \mu\text{mol kg}^{-1}$ .

157

#### 158 **Abiotic parameters - Net-accretion/erosion rates in limestone blocks ( $G_{\text{net}}$ )**

159 Net-accretion/erosion rates were assessed using a limestone block “assay”. Blocks ( $100 \times 100 \times$   
160  $21 \text{ mm}$ ,  $\rho = 2.3 \text{ kg L}^{-1}$ ,  $n = 4$ ) were weighed before and after deployment on the reefs, where they  
161 were exposed to the natural processes of calcification and erosion. Before weighing (Mettler  
162 Toledo XS2002S, readability = 10 mg), blocks were autoclaved and dried for a week in a climate  
163 chamber at  $40^\circ\text{C}$  (BINDER, Tuttlingen, Germany). Blocks were deployed for 6 months  
164 (September 2012 - March 2013), and for 12 months (June 2013 - June 2014) at six sites,  
165 including the four reef sites and the offshore and nearshore back reefs, and for 30 months  
166 (January 2013 – June 2015) in the four reef sites. Upon recovery, blocks were treated with 10 %  
167 bleach for 24 – 36 h to remove organic material.  $G_{\text{net}}$  were expressed as normalized differences  
168 of pre-deployment and post-deployment weights ( $\text{kg m}^{-2} \text{ yr}^{-1}$ ).

169

#### 170 **Biotic parameters - Benthic community composition**

171 To assess coral reef benthic calcifier and bioeroder communities as input data for the carbonate  
172 budgets, we conducted *in situ* surveys on SCUBA along the cross shelf gradient at each of our  
173 study sites. The community composition and coverage of coral reef calcifying groups across was  
174 assessed during both sampling seasons on SCUBA. We surveyed benthic calcifiers and non-

175 calcifiers and categorized them as follows: % cover total hard coral, % hard coral morphs  
176 (branching, encrusting, massive, and platy/foliose), % major reef-building coral families  
177 (Poritidae, Acroporidae, and Pocilloporidae), % cover calcareous crusts, % cover algae &  
178 sponges). For a detailed description of the benthic surveys please refer to Roik et al. (2015). In  
179 addition, benthic rugosity was assessed using the *Tape and Chain Method* (Perry et al., 2012).

180

### 181 **Biotic parameters - Bioeroder populations along the cross shelf gradient**

182 We surveyed the populations for the two main groups of coral reef framework bioeroders, the  
183 parrotfishes (Scaridae) (Bellwood, 1995; Bruggemann et al., 1996) and sea urchins (Echinoidea)  
184 (Bak, 1994). Surveys were conducted on SCUBA in stationary plots and line transects  
185 respectively per site (n = 6 each). For details on the field surveys and data treatment for biomass  
186 conversion, refer to the supplementary materials (Text S1).

187

### 188 **Biotic parameters - Reef carbonate budgets ( $G_{\text{budget}}$ )**

189 Reef carbonate budgets ( $G_{\text{budget}}$ ,  $\text{kg m}^{-1} \text{yr}^{-1}$ ) were estimated following the census-based  
190 *ReefBudget* approach (Perry et al., 2012) adjusted for the central Red Sea. Site-specific benthic  
191 calcification rates ( $G_{\text{benthos}}$ ,  $\text{kg m}^{-1} \text{yr}^{-1}$ ), net-accretion/erosion rates of hard substrate ( $G_{\text{netbenthos}}$ ,  
192  $\text{kg m}^{-1} \text{yr}^{-1}$ ), and erosion rates of crucial macro bioeroders such as sea urchins ( $E_{\text{echino}}$ ,  $\text{kg m}^{-1} \text{yr}^{-1}$ )  
193 and parrotfishes ( $E_{\text{parrot}}$ ,  $\text{kg m}^{-1} \text{yr}^{-1}$ ) were incorporated in the  $G_{\text{budget}}$  estimates (Fig. 1). A detailed  
194 account of calculations is provided in the supplementary materials (Text S1, Equation box S1-3).

195

### 196 **Statistical analyses - Abiotic parameters**

197 Continuous temperature and pH data were summarized as daily means, daily standard deviations  
198 (SD), and daily minima/maxima. Diel profiles were plotted per reef and season including  
199 smoothing polynomial regression lines fitted by *geom\_smooth* in R package *ggplot2* (LOESS,  
200  $\text{span} = 0.1$ ). Data were additionally visualized in histograms using the function *stat\_bin*, as  
201 implemented in the R package *ggplot2* (R Core Team, 2013; Wickham and Chang, 2015).  
202 Univariate 2-factorial permutational ANOVAs (PERMANOVAs, Primer-E V6) were used to test  
203 the factors “reef” (nearshore, midshore lagoon, midshore, and offshore) and “season” (winter and  
204 summer). PERMANOVAs were performed on Euclidian resemblance matrices calculated from  
205  $\log_2(x+1)$  transformed data (Anderson et al., 2008) and were based on 999 permutations of



206 residuals under a reduced model and type II partial sums of squares. Within each significant  
207 factor, pair-wise post-hoc tests followed.

208  
209 Using  $A_T$ ,  $pH_{SWS}$  (seawater samples), salinity, and temperature (from CTD), carbonate chemistry  
210 parameters were calculated using the R package *seacarb* (Gattuso et al., 2015). Carbonic acid  
211 dissociation constants were employed as recommended in Dickson et al. (2007):  $K_1$  &  $K_2$   
212 (Lueker et al., 2000),  $K_f$  (Perez and Fraga, 1987), and  $K_s$  (Dickson, 1990). Then, inorganic  
213 nutrients ( $NO_3^-$  &  $NO_2^-$ ,  $NH_4^+$ , and  $PO_4^{3-}$ ) and carbonate system variables ( $pH_{SWS}$ ,  $A_T$ ,  $C_T$ ,  $\Omega_a$ ,  
214  $HCO_3^-$ ,  $CO_3^{2-}$ ) were evaluated using multivariate PERMANOVAs followed by principal  
215 coordinate ordination (PCO) according to the continuous data test design. Multivariate 2-  
216 factorial PERMANOVAs on Euclidian resemblance matrices created from normalized data were  
217 run under same specifications as above. Next, univariate 2-factorial ANOVAs were employed to  
218 evaluate the parameters separately under the same test design. For this, inorganic nutrients and  
219 carbonate chemistry parameters were transformed ( $\log_2(x+1)$ ):  $pH_{SWS}$ ,  $A_T$ ,  $\Omega_a$ ; square-root:  $C_T$ ,  
220  $CO_3^{2-}$ ; box-cox:  $HCO_3^-$ ) to meet the assumptions of normality and homoscedascity.

221  
222 **Statistical analyses - Net-accretion/erosion rates and carbonate budgets**

223  $G_{net}$  data were tested for effects of the factors “reef” (nearshore, midshore, and offshore), “site  
224 exposure” (fore- and backreef), and “deployment time” (6, 12, and 30 months). Because of the  
225 incomplete design due to missing the nearshore and offshore backreef sites in the 30-months  
226 deployment, a univariate 3-factorial PERMANOVA was conducted using Euclidian distance  
227 matrix 999 permutations of residuals under a reduced model and type II partial sum of squares.

228  $G_{budget}$  were tested for statistical differences between the four “reef sites” (nearshore, midshore  
229 lagoon, midshore, and offshore) using a 1-factorial ANOVA, after box-cox transforming the data  
230 to meet the assumptions. In parallel, biotic variables were tested using a 1-factorial ANOVA for  
231 square-root transformed  $G_{benthos}$ , and non-parametric Kruskal-Wallis tests for non-transformed  
232  $G_{netbenthos}$ ,  $E_{echino}$ , and  $E_{parrot}$ . Tukey’s HSD post-hoc tests followed where applicable.

233  
234 **Statistical analyses - Abiotic-biotic correlations**

235 To evaluate the relationship of abiotic and biotic predictors of  $G_{net}$  and  $G_{budget}$ , a multivariate  
236 statistics approach was applied. Distance-based linear models (DistLM) were performed

237 including biotic and abiotic predictor variables (Primer-E V6). Models were tested for (a)  $G_{\text{net}}$   
238 and (b)  $G_{\text{budget}}$  data.  $G_{\text{net}}$  encompassed data of pooled 12- and 30-months measurements from  
239 four reef sites (nearshore, midshore lagoon, midshore, and offshore). Predictor variables in (a)  
240 were reef growth relevant abiotic parameters, comprising means and SDs from continuous  
241 measurements of temperature and  $\text{pH}_{\text{CTD}}$  per reef site, and the means of inorganic nutrients ( $\text{NO}_3^-$   
242 &  $\text{NO}_2^-$ ,  $\text{NH}_4^+$ , and  $\text{PO}_4^{3-}$ ) and carbonate chemistry parameters ( $A_T$ ,  $C_T$ ,  $\Omega_a$ ,  $\text{HCO}_3^-$ , and  $\text{CO}_3^{2-}$ )  
243 (Table 1). Biotic variables that can potentially influence  $G_{\text{net}}$  on limestone blocks were added to  
244 the models, i.e. parrotfish abundances and percentage cover (%) of calcareous crusts, both  
245 derived from the reef surveys. In (b), the same predictor variables were employed as for (a), but  
246 biotic predictors were extended with additional variables available from reef surveys i.e. % cover  
247 total hard coral, % hard coral morphs (branching, encrusting, massive, and platy/foliose), %  
248 major reef-building coral families (Poritidae, Acroporidae, and Pocilloporidae), % cover  
249 calcareous crusts, % cover algae & sponges, benthic rugosity, and abundances of sea urchins and  
250 parrotfish. Prior to DistLM, some predictor variables (i.e. sea urchin and parrotfish abundances,  
251 % platy/foliose corals, and % Poritidae) were  $\log_{10}(x+1)$  transformed to improve the symmetry  
252 in their distributions following (Anderson et al., 2008). Both DistLM routines were performed on  
253 Euclidian resemblance matrices, implementing the step-wise forward procedure with 9999  
254 permutations and adjusted  $R^2$  criterion. Additionally, Spearman rank correlation coefficients  
255 were obtained for the response variables and their predictors.

## 256 **Results**

257

### 258 **Abiotic parameters relevant for reef growth - Temperature and pH**

259 The seasonal mean temperature varied between  $26.0 \pm 0.6^\circ\text{C}$  in winter and  $30.9 \pm 0.7^\circ\text{C}$  in  
260 summer across all reefs (Table 1). The difference across the shelf was on the average  $\sim 0.4^\circ\text{C}$   
261 (Table S9). The nearshore and midshore reef experienced the lowest (both  $\sim 26^\circ\text{C}$  in winter), and  
262 the nearshore reef the highest mean temperatures ( $31.5 \pm 0.6^\circ\text{C}$  in summer). Seasonal and spatial  
263 differences in all temperature data (daily means, daily SDs, daily minima and maxima) were  
264 significant (Fig. 2 A-B, Table S10). Compared to all other sites, the nearshore reef experienced  
265 significantly higher daily maxima during summer (“daily max.”,  $p = 0.01$ , Fig. 2 B, Table S9),  
266 and significantly lower minima during winter ( $p < 0.01$ , see also Table S10).

267

268 Across all reef sites, seasonal means for pH were  $8.13 \pm 0.19$  in winter and  $8.15 \pm 0.13$  in  
269 summer (Table 1). Lowest seasonal means were recorded on the midshore lagoon with  $8.00 \pm$   
270  $0.17$  in winter and  $8.09 \pm 0.22$  in summer, and highest in the nearshore reef ( $8.25 \pm 0.27$  in  
271 winter and  $8.31 \pm 0.12$  in summer). pH was intermediate on the exposed midshore and offshore  
272 ( $8.10 \pm 0.05$  to  $8.16 \pm 0.09$ ). Overall, continuous pH data showed that spatial differences were  
273 more pronounced (with a mean difference between site averages of 0.15 pH units, Table S9),  
274 compared to minor effect of seasonality (with a mean difference between seasonal averages of  
275 0.02 pH units). All daily-pH variables differed between reef sites ( $p < 0.01$ , Table S10, Fig. 2 C-  
276 D). Daily-pH SDs and maxima were significantly different between the seasons ( $p < 0.01$  and  $p$   
277  $< 0.05$ , respectively). On all sites, pH followed a diel pattern with peak values around noon  
278 (12:00 h).

279

### 280 **Abiotic parameters relevant for reef growth - Inorganic nutrients and carbonate chemistry**

281 Inorganic nutrients and carbonate chemistry showed a major variation between the seasons (both  
282  $p < 0.001$ , Table S10, Fig. S1). Specifically,  $\text{NO}_3^-$  &  $\text{NO}_2^-$  and  $\text{NH}_4^+$  levels almost doubled in  
283 winter ( $0.36 \pm 0.25 \mu\text{mol L}^{-1}$  and  $0.35 \pm 0.20 \mu\text{mol L}^{-1}$ ) compared to summer ( $0.61 \pm 0.25 \mu\text{mol}$   
284  $\text{L}^{-1}$  and  $0.50 \pm 0.22 \mu\text{mol L}^{-1}$ ). In contrast,  $\text{PO}_4^{3-}$  was higher in winter than in summer ( $0.07 \pm$   
285  $0.02$  vs.  $0.03 \pm 0.02 \mu\text{mol L}^{-1}$ , Table 1, Table S10 and Fig. 3 A). Highest inorganic nutrient  
286 contents were measured in the midshore lagoon with up to  $0.68 \mu\text{mol NO}_3^-$  &  $\text{NO}_2^- \text{L}^{-1}$ ,  $0.58 \mu\text{mol}$

287  $\text{NH}_4^+ \text{L}^{-1}$  in summer, and  $0.07 \mu\text{mol PO}_4^{3-} \text{L}^{-1}$  in winter, but  $\text{PO}_4^{3-}$  was also high on the offshore  
288 reef during winter ( $0.08 \mu\text{mol PO}_4^{3-} \text{L}^{-1}$ ).

289  
290 Carbonate chemistry analysis show overall elevated  $\text{A}_\text{T}$ ,  $\text{C}_\text{T}$  and  $\text{HCO}_3^-$  concentrations in winter  
291 ( $2423 \pm 18 \mu\text{mol A}_\text{T} \text{L}^{-1}$ ,  $1990 \pm 21 \mu\text{mol C}_\text{T} \text{L}^{-1}$ , and  $1683 \pm 24 \mu\text{mol HCO}_3^- \text{L}^{-1}$ ) compared to  
292 summer ( $2369 \pm 38 \mu\text{mol A}_\text{T} \text{L}^{-1}$ ,  $1910 \pm 36 \mu\text{mol C}_\text{T} \text{L}^{-1}$ , and  $1588 \pm 41 \mu\text{mol HCO}_3^- \text{L}^{-1}$ , Table  
293 1, Fig. 3 B, Table S10). Estimates of  $\text{pCO}_2$  in this study ranged 285 - 315  $\mu\text{atm}$  across reef and  
294 seasons.  $\text{C}_\text{T}$  and  $\text{HCO}_3^-$  were significantly higher during winter at all sites ( $p < 0.05$ ), while  $\text{A}_\text{T}$   
295 was only higher in the nearshore ( $p < 0.05$ ), remaining at similar levels in the other sites.  
296 Conversely,  $\Omega_\text{a}$  and  $\text{CO}_3^{2-}$  were overall reduced during winter (winter:  $4.62 \pm 0.12 \Omega_\text{a}$  and  $299 \pm$   
297  $7 \mu\text{mol CO}_3^{2-} \text{L}^{-1}$ ; summer:  $4.95 \pm 0.28 \Omega_\text{a}$  and  $314 \pm 17 \mu\text{mol CO}_3^{2-} \text{L}^{-1}$ ). Changes in  $\Omega_\text{a}$  between  
298 the seasons were only found in the offshore site ( $p < 0.05$ ). By trend,  $\text{A}_\text{T}$  and  $\Omega_\text{a}$  increased from  
299 nearshore to offshore with average differences of  $32 \mu\text{mol kg}^{-1}$  and  $\Omega_\text{a}$  0.2 (Table S9).

300  
301 **Biotic parameters relevant for reef growth - Benthic community composition**  
302 A detailed account of benthic community structure in the study sites is outlined in Roik et al.  
303 (2015). In brief, a low percentage of live substrate ( $< 40 \%$ ) was characteristic of the sheltered  
304 and lagoonal sites. In exposed sites (offshore and midshore) a community of calcifying  
305 organisms took up to 48 % of benthos cover on average (hard corals and calcareous crusts).  
306 Major reef-building corals were the genera *Acropora*, *Pocillopora*, and *Porites* constituting 32–  
307 56 % of the total hard coral cover.

308  
309 **Biotic parameters relevant for reef growth - Abundances and biomasses of macro**  
310 **bioeroders**

311 A total of 718 parrotfishes and 110 sea urchins were observed in the present study. For sea  
312 urchins, mean abundances and biomass estimates of  $0.002 \pm 0.004 - 0.014 \pm 0.006$  individuals  
313  $\text{m}^{-2}$  and  $0.05 \pm 0.04 - 1.43 \pm 0.98 \text{ g m}^{-2}$  were observed, respectively (Table S4). Parrotfish mean  
314 abundances and biomass estimates ranged from  $0.05 \pm 0.01 - 0.17 \pm 0.60$  individuals  $\text{m}^{-2}$  and  
315  $19.54 \pm 5.56 - 82.18 \pm 46.67 \text{ g m}^{-2}$ , respectively (Table S6). The highest abundances and  
316 biomasses of both parrotfishes and sea urchins were observed at the exposed nearshore site.  
317 Abundances and biomasses of these two bioeroding groups decreased towards the exposed

318 midshore site, and then increased again towards the exposed offshore site. The inshore sites  
319 along with the exposed midshore site exhibited the largest range of sea urchin size classes (from  
320 categories 1 or 2 to the largest size class 5), while at the exposed sites, only the two smallest size  
321 classes of sea urchins were recorded. The largest parrotfishes (category 5 parrotfish, i.e., > 45 cm  
322 – 69 cm fork length) were observed at the midshore sites and the sheltered offshore site. With the  
323 exception of the exposed midshore site, category 1 (5 – 14 cm) parrotfish were commonly  
324 observed at all sites. In contrast, no category 6 parrotfish ( $\geq 70$  cm fork length) were observed  
325 during the surveys.

326

### 327 **Net-accretion/erosion rates**

328 Cumulative net-accretion/erosion rates  $G_{\text{net}}$  were measured in assays over 6, 12, 30 months in the  
329 reef sites along the cross-shelf gradient. Visible boring traces of endolithic worms or sponges  
330 were only found on the surfaces of blocks recovered after 12 and 30 months (Fig. 4 A - H).  $G_{\text{net}}$   
331 based on the 30-months deployment of blocks ranged between  $-0.96$  and  $0.37 \text{ kg m}^{-2} \text{ yr}^{-1}$  (Table  
332 2).  $G_{\text{net}}$  for 12 and 30-months blocks were negative on the nearshore reef (between  $-0.96$  and  $-0.2$   
333  $\text{kg m}^{-2} \text{ yr}^{-1}$ , i.e., net erosion is apparent), near-zero on the midshore reef ( $0.01 - 0.06 \text{ kg m}^{-2} \text{ yr}^{-1}$ ,  
334 i.e., low net accretion), and positive on the offshore reef (up to  $0.37 \text{ kg m}^{-2} \text{ yr}^{-1}$ , i.e., high net  
335 accretion). Reef sites and deployment times had a significant effect on the variability of  $G_{\text{net}}$   
336 (Table S11). The rate of accretion/erosion was higher in the measurements over longest  
337 deployment period ( $p < 0.001$ , Figure S2).

338

### 339 **Carbonate budgets**

340 The carbonate budget  $G_{\text{budget}}$ , estimated via the *ReefBudget* approach (Perry et al., 2012) and  
341 averaged over all sites was  $0.65 \pm 1.73 \text{ kg m}^{-2} \text{ yr}^{-1}$ . This average encompasses values from the  
342 negative nearshore budget  $-1.48 \pm 1.75 \text{ kg m}^{-2} \text{ yr}^{-1}$  to the positive offshore budget  $2.44 \pm 1.03 \text{ kg}$   
343  $\text{m}^{-2} \text{ yr}^{-1}$  (Table 3).  $G_{\text{budget}}$  significantly different between the reef sites ( $p < 0.05$ , Fig. 5 A),  
344 except for budgets in both midshore sites (lagoon and exposed), which were similar. Biotic  
345 variables that account for the carbonate budgets also differed by site, in the case of community  
346 calcification rates  $G_{\text{benthos}}$  ( $p < 0.05$ , Fig. 5 B), and net-accretion/erosion of bare substrate  
347  $G_{\text{netbenthos}}$  ( $p < 0.001$ , Fig. 5 C). However, differences of parrot fish and echinoid erosion rates  
348 ( $E_{\text{echino}}$  and  $E_{\text{parrot}}$ ) were not significant (Fig. 5 D -E).

349

350 **Abiotic and biotic drivers related to net-accretion rates and carbonate budgets**

351 Results from correlations and distance based linear models were similar for  $G_{\text{net}}$  and  $G_{\text{budget}}$ .  
352 Temperature means, temperature SDs, and pH SDs were negatively correlated, while  $A_T$ ,  $\Omega_a$ ,  
353  $\text{CO}_3^{2-}$ , and  $\text{PO}_4^{3-}$  were positively correlated with  $G_{\text{net}}$  ( $\rho \geq |0.59|$ , Table 4). The best model for  
354  $G_{\text{net}}$  data accounted for 56% (adjusted  $R^2$ ) of the total variation. Here,  $A_T$  alone explained 54% of  
355 the data and was the only statistically valid predictor of two abiotic variables in the model (the  
356 second being  $\Omega_a$  accounting for only 2% more, Table 5). Negative correlates of  $G_{\text{budget}}$  were  
357 temperature means, temperature SDs, and pH SDs, while  $A_T$ ,  $\Omega_a$ ,  $\text{CO}_3^{2-}$ , and  $\text{PO}_4^{3-}$  were positives  
358 ( $\rho \geq |0.59|$ , Table 4). Among biotic variables, % total hard coral and calcareous crusts were  
359 positively correlated. The best model for  $G_{\text{budget}}$  fitted six biotic and abiotic predictors and  
360 explained total variation of 87% (adjusted  $R^2$ ). Again,  $A_T$  was the major predictor explaining  
361 65% alone. The biotic variable ‘parrotfish abundance’ added up to 85% of explained variation.  
362 Both variables were significant in the test. The remaining four predictors included in the model  
363 ( $\text{NO}_3^-$  &  $\text{NO}_2^-$ , % cover total hard coral, % encrusting coral, % of total hard coral, and %  
364 Acroporidae) were non-significant and of minute relevance (altogether contributing only 3%,  
365 Table 5).

## 366 **Discussion**

367  
368 In this study we present environmental data of abiotic and biotic variables affecting present-day  
369 reef growth in the central Red Sea, a geographic region that is governed by unique conditions of  
370 high salinity and temperature, and that is impacted by ocean warming (Cantin et al., 2010;  
371 Raitzos et al., 2011). To date, reef growth, more specifically the calcification rates of reef-  
372 building corals in the Red Sea, have mostly been investigated regarding the effect of high  
373 temperature (Cantin et al., 2010; Roik et al., 2015; Sawall et al., 2015). Our study is therefore the  
374 first to link calcification data on an ecosystem scale with a range of abiotic and biotic variables  
375 (carbonate chemistry and nutrient availability; abundance and activity of main bioeroders,  
376 respectively). This is achieved by applying a census-based carbonate budget ( $G_{\text{budget}}$ ) approach  
377 following (Perry et al., 2012). Our approach integrates the net-accretion/erosion rates ( $G_{\text{net}}$ ) of  
378 six reef sites along the cross-shelf gradient assessed *in situ* using a limestone block assay.  
379 Additionally, our study provides an account of carbonate system conditions of the reefs in the  
380 central Red Sea, where such data is sparse. In the following, we discuss central Red Sea reef  
381 growth rates, which span from net-erosive states in the nearshore reef, to net-accretion in the  
382 midshore and offshore reefs, in the context of the prevailing abiotic and biotic drivers. Finally,  
383 we discuss our results in a global and historical context.

### 384 385 **Abiotic factors governing reef growth in the central Red Sea**

386 In this study we characterized the present-day abiotic conditions temperature, carbonate  
387 chemistry, and inorganic nutrients in the central Red Sea, which are considered environmental  
388 parameters that affect calcification and bioerosion on coral reefs. Notably, carbonate system  
389 variables, i.e.,  $A_T$ ,  $\Omega_a$ , and  $p\text{CO}_2$ , observed in the study sites were on average closer to global pre-  
390 industrial values rather than to recent measurements from Pacific or Caribbean coral reef systems  
391 (Table 6). First, this comparison implies that Red Sea waters provide a beneficial environment  
392 for reef calcifiers that depend on availability of carbonate ions (i.e., high  $\Omega_a$ , low  $p\text{CO}_2$ ). Second,  
393 Red Sea waters have a high buffering capacity against ocean acidification and will probably  
394 protect reefs from this threat in the near future, while reefs outside the Red Sea might soon reach  
395 a critically low  $\Omega_a$  threshold, which is projected to bring calcification to a halt (Manzello et al.,  
396 2008; Yeakel et al., 2015).

397 In the present study abiotic conditions varied on temporal (seasonal, diel) and spatial scales  
398 (cross-shelf gradient, exposed/sheltered reef sites). The observation of the seasonality of the  
399 carbonate system was similar to what we know about the high latitude reefs of the GoA, where  
400  $A_T$  and  $C_T$  decrease while  $\Omega_a$  increase during summer (Silverman et al., 2007a). While seasonal  
401 dynamics of inorganic nutrient concentrations have been shown by remote sensing data for the  
402 entire Red Sea basin (Raitzos et al., 2013), the present study demonstrates such dynamics on  
403 local reef scale, which again was similar to seasonality in the northern reefs of the GoA (Bednarz  
404 et al., 2015). Noteworthy for our study sites was a  $PO_4^{3-}$  enrichment during the winter.

405  
406 Our continuous recordings show diel fluctuations of temperature and pH that are particularly  
407 strong in the nearshore and midshore lagoon sites. Diel pH fluctuation is the consequence of  
408 benthic biotic processes, i.e., calcification, dissolution, and respiration/photosynthesis that  
409 influence the balance of DIC species through removal, contribution, or exchange of molecules  
410 such as  $CO_3^{2-}$ ,  $CO_2$ , and  $O_2$ , also referred to as biotic feedback (Bates et al., 2010; Silverman et  
411 al., 2007a; Zundevich et al., 2007). The diel pH was more stable in the exposed midshore and  
412 offshore site reflecting a weaker biotic feedback, which was likely buffered by the higher rates of  
413 reef water mixing with the open sea water (Roik et al., 2016). Diel pH ranges measured on  
414 various coral reefs across the globe extend from  $\sim 7.80$  to  $\sim 8.20$  pH (Albright et al., 2013;  
415 Silbiger et al., 2014) and can span even larger ranges of up to  $\sim 1.40$  pH units (Hofmann et al.,  
416 2011). Such diel pH variations suggest potential co-fluctuation of  $A_T$  and  $\Omega_a$ , which can impact  
417 calcification rates at daily time scales. The nearshore and midshore lagoonal reefs from the  
418 present study offer suitable study sites to further investigate these small-scale processes, which  
419 to date remain poorly studied.

420  
421 The difference between nearshore to offshore  $A_T$  and  $\Omega_a$  in our study area was on average at a  
422 range of  $32 \mu\text{mol } A_T \text{ kg}^{-1}$  and  $0.2 \Omega_a$ , respectively (Table S9). Similar cross-shelf differences are  
423 reported from e.g. reefs in Bermuda ( $20 - 40 \mu\text{mol } A_T \text{ kg}^{-1}$ ) (Bates et al., 2010). Also in this case,  
424 water circulation patterns may explain these spatial gradients. The offshore and midshore reefs  
425 receive currents from the Red Sea basin (Roik et al., 2016), which supplies  $A_T$  saturated open sea  
426 water to the reefs. In contrast, the nearshore reef and midshore lagoon are mostly supplied by the



427 boundary current from the south (Roik et al., 2016) travelling along the coastal reef systems  
428 which deplete its  $A_T$ .

429  
430 Indeed, the differences in seawater chemistry between offshore and nearshore reefs were  
431 correlated to reef growth processes: the most striking negative correlates were (a) mean  
432 temperatures and (b) pH variability, while (c) carbonate system parameters indicative of  
433 carbonate ion availability, i.e.  $A_T$ ,  $\Omega_a$ ,  $CO_3^{2-}$ , and also (d)  $PO_4^{3-}$  concentrations were positively  
434 related to reef growth. The negative correlates (a - b) reflect that higher mean temperatures and  
435 the impact of strong biotic feedbacks causing pH fluctuations govern nearshore habitats of low  
436 reef growth capacity. Previously, pH fluctuation on the micro-habitat scale has been shown to  
437 have a significant impact on accretion and erosion dynamics on coral reefs (Silbiger et al., 2014).  
438 Potentially these conditions physiologically challenge reef-building organisms exerting a  
439 negative effect on the reef growth rate. The positive effect of higher  $A_T$ ,  $\Omega_a$ ,  $CO_3^{2-}$  on the  
440 calcification process is well established in laboratory experiments and on reef communities *in*  
441 *situ* (Langdon et al., 2000, Schneider and Erez, 2006, Silverman et al., 2007b, Bates et al., 2010).  
442  $A_T$  was indeed the strongest predictor for both  $G_{net}$  and  $G_{budget}$ , alone explaining more than half of  
443 the variation in reef growth rates in the present study. Interestingly, our study also identifies  
444  $PO_4^{3-}$  concentration, an essential macronutrient and important source of energy for primary  
445 producers and reef calcifiers (Ferrier-Pagès et al., 2016), to be a strong abiotic correlate of reef  
446 growth. While an overload of inorganic nutrients can be detrimental for the calcification process  
447 (Fabricius, 2005; Tambutté et al., 2011), our results show that in a highly oligotrophic reef  
448 system, such as the Red Sea, reef growth might be positively affected by seasonal increases in  
449  $PO_4^{3-}$  levels. Experimental studies have shown that  $PO_4^{3-}$  additions can help maintain coral-algae  
450 symbiosis in reef-building corals that suffer from heat-stress (Ezzat et al., 2016). Also, under  
451 circumstances phosphorus limitation can increase the stress susceptibility of the coral-algae  
452 symbiosis (Pogoreutz et al., 2017; Rådecker et al., 2015; Wiedenmann et al., 2013). In the light  
453 of our results, it will be of interest to further study spatio-temporal variation of inorganic nutrient  
454 ratios to understand their effects on large-scale and long-term trends of reef growth in the central  
455 Red Sea.

456

457

## 458 **Biotic factors governing reef growth in the central Red Sea**

459 Calcifying benthic communities contribute to carbonate production and are considered the most  
460 influential drivers for  $G_{\text{budgets}}$  on global scale (Franco et al., 2016). Loss of coral cover rapidly  
461 gives way to increased bioerosion as the critical force of degradation of the carbonate reef  
462 framework. This has become particularly apparent in the Caribbean, where  $G_{\text{budgets}}$  were reported  
463 to shift into negative production states when live hard coral cover dropped below 10% (Perry et  
464 al., 2013). Similarly, the relevance of benthic calcifying communities (coral and coralline algae)  
465 was highly apparent in the present dataset from the central Red Sea: benthos cover percentage of  
466 total hard coral and calcareous crusts constituted the strongest positive correlates for  $G_{\text{budget}}$ , and  
467 the latter also for the variable  $G_{\text{net}}$ .

468  
469 Considerably, the community composition and abundances of bioeroders potentially influence  
470 reef carbonate budgets (Alvarez-Filip et al., 2009; Bak, 1994; Bellwood, 1995; Bronstein and  
471 Loya, 2014; Bruggemann et al., 1996). Our analyses show that parrotfish erosion was a  
472 considerable driving force across our study sites. Parrotfish abundances explained ~20% of  
473  $G_{\text{budget}}$  data variation, reflecting high parrotfish erosion in the nearshore likely contributing to the  
474 net erosion state. Parrotfish abundances and biomasses were lowest at the sheltered midshore  
475 site, and both increased towards inshore and offshore. Such differences can be attributed to  
476 natural (e.g., species distribution, habitat preferences, reef rugosity) and/or anthropogenically-  
477 driven factors (e.g., differential fishing pressure; McClanahan, 1994; McClanahan et al., 1994).  
478 Indeed, the Saudi Arabian central Red Sea is subject to decade-long unregulated fishing pressure,  
479 which has significantly altered overall reef fish community structures and reduced overall fish  
480 biomass compared to less impacted regions in the Red Sea (Kattan et al., 2017). In undisturbed  
481 coral reefs, parrotfishes are abundant herbivores with the differential capability to remove algal  
482 turfs/macroalgae and/or coral reef framework and therefore a complex implications for coral reef  
483 growth (Green and Bellwood, 2009): The ecological role of parrotfish grazing is the regulation  
484 of benthic algal growth, supporting the recruitment of reef calcifiers and helping maintain a  
485 coral-dominated state (Mumby, 2006). Hence, low parrotfish abundances would primarily reduce  
486 erosion pressure on a reef, but secondarily promote phase-shift to non-calcifying organisms, such  
487 as fleshy macroalgae (Hughes et al 2007). In the long term, this can cause a decrease in gross  
488 carbonate production. Moreover, the overfishing of (parrot)fishes can reduce feeding pressure on

489 bioeroders or their larvae (e.g., sea urchins), resulting in an uncontrolled population increase  
490 leading reefs the trajectory of degradation driven by expanding bioeroder populations (Edgar et  
491 al., 2010; McClanahan and Shafir, 1990).

492

### 493 **Cross-shelf patterns of net accretion/erosion rates and carbonate budget estimates**

494 Net accretion/erosion rates ( $G_{\text{net}}$ ) were measured in limestone block assays, in which blocks were  
495 exposed to natural levels of biotic  $\text{CaCO}_3$  accretion (mainly by encrusting calcifiers), endolithic  
496 erosion by boring organisms, and surface abrasion by grazing fish along a cross-shelf gradient  
497 (Tribollet and Golubic, 2005). The resulting cumulative  $G_{\text{net}}$  reflects the colonization progress on  
498 the limestone blocks (Chazottes et al., 1995; Tribollet and Golubic, 2005). Differences in  $G_{\text{net}}$   
499 along the cross-shelf gradient however were only observed after an exposure time of greater than  
500 12 months, when well established epilithic and endolithic communities were apparent (Figure 4,  
501 Figure S2). Measurements from the 30-months assay reveal a net-erosion state (negative rates) in  
502 nearshore and net-accretion state (positive rates) in the offshore reef habitat. On average,  $G_{\text{net}}$   
503 rates were in a similar range as observed in the reefs of Moorea (-0.49 - 0.63  $\text{kg m}^{-2} \text{yr}^{-1}$ , (Pari et  
504 al., 1998). Yet, net-erosion states in the Red Sea did not reach the most extreme erosive scales  
505 reported from e.g. Moorea or the Andaman Sea, where lowest values were  $\sim -7$  to  $-4 \text{ kg m}^{-2} \text{yr}^{-1}$   
506 (Pari et al., 1998; Schmidt and Richter, 2013).

507

508  $G_{\text{budgets}}$  represent the cumulative contribution of the major biotic drivers of reef growth ( $G_{\text{benthos}}$ ,  
509  $G_{\text{netbenthos}}$ ,  $E_{\text{echino}}$  and  $E_{\text{parrot}}$ ) for each site (Glynn, 1997; Perry et al., 2012) and resulted in a net-  
510 erosive budget in the nearshore reef, low net-accretion (near zero) in the midshore reef, up to a  
511 high net-accretion budget in offshore. Increasing across reef sites from nearshore to offshore,  
512  $G_{\text{budgets}}$  imply that nearshore reefs currently erode with half the speed that the offshore reefs  
513 grow, which may be interpreted as the formation of an offshore barrier reef in the central Red  
514 Sea (see Figure 5). The cross-shelf dynamics of  $G_{\text{budgets}}$  and the biotic drivers ( $G$  and  $E$ ) are  
515 complex and follow unique patterns that are in parts distinct from what we know from other reef  
516 systems. Other than observed in the GBR, where reef growth is reported to be high at inshore  
517 reefs (Browne et al., 2013), our nearshore study site, was net-erosive. Also, parrotfish erosion  
518 was highest in the nearshore area in the present Red Sea study, whereas lower rates were  
519 reported for the inshore reefs in the GBR (Hoey and Bellwood, 2007; Tribollet et al., 2002). On

520 Caribbean islands, parrotfish erosion rates are higher in leeward reefs (that are similar to  
521 protected nearshore habitats), but these sites are typically characterized by a high coral cover  
522 which drives a positive  $G_{\text{budget}}$  (Perry et al., 2012, 2014). Unlike in the Red Sea nearshore reef,  
523 which had the highest parrotfish erosion, but a negative  $G_{\text{budget}}$  due to low coral cover. This inter-  
524 regional comparison demonstrates that patterns encountered in one cross-shelf reef system  
525 should not necessarily be extrapolated to another system. In conclusion, *in situ* studies will be  
526 required for each unique system to understand its dynamics and its responses to environmental  
527 change.

528

### 529 **Global and historical perspective on reef growth in the Red Sea**

530 The central Red Sea  $G_{\text{budgets}}$  are comparable with a majority of reef sites in the Caribbean, eastern  
531 and central western Pacific ranging from  $-0.8$  to  $4.5 \text{ kg m}^{-2} \text{ yr}^{-1}$  (Mallela and Perry, 2007). The  
532 highest  $G_{\text{budgets}}$  from the Red Sea are in the range of average global reef growth. However, Red  
533 Sea reefs do not reach highest accretion estimates reported, e.g, from the remote reefs in the  
534 Indian Ocean at the Chagos Archipelago which still hold the record with up to  $9.8 \text{ kg m}^{-2} \text{ yr}^{-1}$   
535 (Perry et al., 2015).

536

537 Due to lacking comparative data, it remains difficult to draw a historical perspective on  $G_{\text{budgets}}$   
538 in the Red Sea. Among the data available are pelagic and reefal net carbonate accretion rates,  
539 estimated using basin-scale historical measurements of  $A_T$  from 1998 (Steiner et al., 2014).  
540 Another data set is the census-based budget approach from a fringing reef in GoA from 1994 –  
541 1996 ((Dullo et al., 1996). Both, the  $A_T$ -based reef accretion estimate from 1998 ( $0.9 \text{ kg m}^{-2} \text{ yr}^{-1}$ )  
542 and the GoA fringing reef budget from 1994 –1996 ( $0.7 - 0.9 \text{ kg m}^{-2} \text{ yr}^{-1}$ ), constitute a good  
543 match. As well,  $G_{\text{budgets}}$  assessed in the present study are in accordance with these historical data  
544 providing a comparison that supports the notion of stable reef growth rates in the Red Sea over  
545 the most recent decades. Additionally, the gross calcification rate of benthic communities  
546 ( $G_{\text{benthos}}$ ) from our offshore site compares well with the maxima measured in GoA reefs in 1994  
547 ( $2.7 \text{ kg m}^{-2} \text{ yr}^{-1}$ , Heiss, 1995).

548

549 Reef growth data from the Red Sea region is sparse, but suggest that coral reef growth might  
550 have not changed over the past 20 years despite the ongoing warming trend (Raitsos et al., 2011).

551 However, comparisons of data from the central Red Sea and GoA should be interpreted with  
552 caution. Due to the strong latitudinal gradient of temperature and salinity between the central  
553 Red Sea and GoA, reef growth dynamics from the two regions may differ and introduce bias in  
554 the comparisons. Especially, in the light of a recent study demonstrating that increasing warming  
555 rates of sea surface temperatures since 1990 coincided with decreasing coral calcification rates in  
556 the central Red Sea (Cantin et al., 2010), it remains to be determined whether this declining  
557 calcification capacity has an impact on the overall reef growth. In this context, the data presented  
558 in this study will serve as a valuable baseline for comparative future studies in the central Red  
559 Sea region. Importantly, these data were collected before the Third Global Bleaching Event,  
560 which impacted the region during summer 2015 (Monroe et al., in review) and 2016. Hence, our  
561 report will be of great value when assessing potential (long-term) changes in the Red Sea  $G_{\text{budget}}$   
562 after that significant disturbance.

563

## 564 **Conclusions**

565 The Red Sea represents a geographic region where coral reefs thrive under naturally high  
566 temperature, high salinity, and high alkalinity conditions. Baseline data for reef growth from this  
567 region are valuable as they provide insight into reef functioning under remarkably variable  
568 abiotic conditions that deviate from the global average for coral reefs, and can potentially  
569 provide a window into future ocean scenarios. Our data show that carbonate chemistry compares  
570 to estimates of preindustrial global ocean surface water, suggesting low susceptibility to ocean  
571 acidification for reef calcifiers in the Red Sea. Yet, it remains to be determined how small-scale  
572 changes in carbonate chemistry will affect overall reef growth in the central Red Sea under  
573 prevailing high temperatures. The offshore reef growth rate from the central Red Sea are  
574 comparable to other regions of this world and historical Red Sea data suggest that rates might  
575 have not decreased over the past few decades, but rather remained unchanged since 1995 in the  
576 Red Sea. Our study shows that carbonate budgets are a powerful tool to track the trajectories of  
577 modern-day and future reef states. Our data should provide a valuable baseline and foundation  
578 data for evaluating the impact of disturbances, such as the most recent high temperature  
579 anomalies on the reef-building communities and the overall reef growth capacity in the central  
580 Red Sea.

581

582 **Acknowledgements**

583 We thank CMOR for assistance with field operations. This study was supported by funding from  
584 King Abdullah University of Science and Technology (KAUST).

585

## 586 **References**

587

588 Albright, R., Langdon, C. and Anthony, K. R. N.: Dynamics of seawater carbonate chemistry,  
589 production, and calcification of a coral reef flat, Central Great Barrier Reef, *Biogeosciences*  
590 *Discuss.*, 10, 7641–7676, doi:10.5194/bgd-10-7641-2013, 2013.

591 Alvarez-Filip, L., Dulvy, N. K., Gill, J. A., Côté, I. M. and Watkinson, A. R.: Flattening of  
592 Caribbean coral reefs: region-wide declines in architectural complexity, *Proc. R. Soc. Lond. B*  
593 *Biol. Sci.*, 276(1669), 3019–3025, doi:10.1098/rspb.2009.0339, 2009.

594 Anderson, M. J., Gorley, R. N. and Clarke, K. R.: PERMANOVA+ for PRIMER: Guide to  
595 software and statistical methods, 2008.

596 Bak, R. P. M.: Sea urchin bioerosion on coral reefs: place in the carbonate budget and relevant  
597 variables, *Coral Reefs*, 13(2), 99–103, doi:10.1007/BF00300768, 1994.

598 Bak, R. P. M., Nieuwland, G. and Meesters, E. H.: Coral Growth Rates Revisited after 31 Years:  
599 What is Causing Lower Extension Rates in *Acropora Palmata*?, *Bull. Mar. Sci.*, 84(3), 287–294,  
600 2009.

601 Bates, N. R., Amat, A. and Andersson, A. J.: Feedbacks and responses of coral calcification on  
602 the Bermuda reef system to seasonal changes in biological processes and ocean acidification,  
603 *Biogeosciences*, 7(8), 2509–2530, doi:10.5194/bg-7-2509-2010, 2010.

604 Bauman, A. G., Feary, D. A., Heron, S. F., Pratchett, M. S. and Burt, J. A.: Multiple  
605 environmental factors influence the spatial distribution and structure of reef communities in the  
606 northeastern Arabian Peninsula, *Mar. Pollut. Bull.*, 72(2), 302–312,  
607 doi:10.1016/j.marpolbul.2012.10.013, 2013.

608 Bednarz, V., Cardini, U., van Hoytema, N., Al-Rshaidat, M. and Wild, C.: Seasonal variation in  
609 dinitrogen fixation and oxygen fluxes associated with two dominant zooxanthellate soft corals  
610 from the northern Red Sea, *Mar. Ecol. Prog. Ser.*, 519, 141–152, doi:10.3354/meps11091, 2015.

611 Bellwood, D. R.: Direct estimate of bioerosion by two parrotfish species, *Chlorurus gibbus* and  
612 *C. sordidus*, on the Great Barrier Reef, Australia, *Mar. Biol.*, 121(3), 419–429,  
613 doi:10.1007/BF00349451, 1995.

614 Bronstein, O. and Loya, Y.: Echinoid community structure and rates of herbivory and bioerosion  
615 on exposed and sheltered reefs, *J. Exp. Mar. Biol. Ecol.*, 456, 8–17,  
616 doi:10.1016/j.jembe.2014.03.003, 2014.

617 Browne, N. K., Smithers, S. G. and Perry, C. T.: Carbonate and terrigenous sediment budgets for  
618 two inshore turbid reefs on the central Great Barrier Reef, *Mar. Geol.*, 346, 101–123,  
619 doi:10.1016/j.margeo.2013.08.011, 2013.

620 Bruggemann, J., van Kessel, A., van Rooij, J. and Breeman, A.: Bioerosion and sediment  
621 ingestion by the Caribbean parrotfish *Scarus vetula* and *Sparisoma viride*: implications of fish

- 622 size, feeding mode and habitat use, *Mar. Ecol. Prog. Ser.*, 134, 59–71, doi:10.3354/meps134059,  
623 1996.
- 624 Buddemeier, R. W.: Symbiosis: Making light work of adaptation, *Nature*, 388(6639), 229–230,  
625 doi:10.1038/40755, 1997.
- 626 Cai, W.-J., Ma, Y., Hopkinson, B. M., Grottoli, A. G., Warner, M. E., Ding, Q., Hu, X., Yuan,  
627 X., Schoepf, V., Xu, H., Han, C., Melman, T. F., Hoadley, K. D., Pettay, D. T., Matsui, Y.,  
628 Baumann, J. H., Levas, S., Ying, Y. and Wang, Y.: Microelectrode characterization of coral  
629 daytime interior pH and carbonate chemistry, *Nat. Commun.*, 7, 11144,  
630 doi:10.1038/ncomms11144, 2016.
- 631 Cantin, N. E., Cohen, A. L., Karnauskas, K. B., Tarrant, A. M. and McCorkle, D. C.: Ocean  
632 Warming Slows Coral Growth in the Central Red Sea, *Science*, 329(5989), 322–325,  
633 doi:10.1126/science.1190182, 2010.
- 634 Carricart-Ganivet, J. P., Cabanillas-Terán, N., Cruz-Ortega, I. and Blanchon, P.: Sensitivity of  
635 Calcification to Thermal Stress Varies among Genera of Massive Reef-Building Corals, *PLoS*  
636 *ONE*, 7(3), e32859, doi:10.1371/journal.pone.0032859, 2012.
- 637 Chazottes, V., Campion-Alsumard, T. L. and Peyrot-Clausade, M.: Bioerosion rates on coral  
638 reefs: interactions between macroborers, microborers and grazers (Moorea, French Polynesia),  
639 *Palaeogeogr. Palaeoclimatol. Palaeoecol.*, 113(2–4), 189–198, doi:10.1016/0031-  
640 0182(95)00043-L, 1995.
- 641 Chazottes, V., Le Campion-Alsumard, T., Peyrot-Clausade, M. and Cuet, P.: The effects of  
642 eutrophication-related alterations to coral reef communities on agents and rates of bioerosion  
643 (Reunion Island, Indian Ocean), *Coral Reefs*, 21(4), 375–390, 2002.
- 644 Cohen, A. L. and Holcomb, M.: Why corals care about ocean acidification: uncovering the  
645 mechanism, *Oceanography*, (22), 118–127, 2009.
- 646 Cooper, T. F., Death, G., Fabricius, K. E. and Lough, J. M.: Declining coral calcification in  
647 massive *Porites* in two nearshore regions of the northern Great Barrier Reef, *Glob. Change Biol.*,  
648 14(3), 529–538, doi:10.1111/j.1365-2486.2007.01520.x, 2008.
- 649 Couce, E., Ridgwell, A. and Hendy, E. J.: Environmental controls on the global distribution of  
650 shallow-water coral reefs, *J. Biogeogr.*, 39(8), 1508–1523, doi:10.1111/j.1365-  
651 2699.2012.02706.x, 2012.
- 652 Death, G., Lough, J. M. and Fabricius, K. E.: Declining Coral Calcification on the Great Barrier  
653 Reef, *Science*, 323(5910), 116–119, doi:10.1126/science.1165283, 2009.
- 654 Dickson, A. G.: Standard potential of the reaction:  $\text{AgCl(s)} + 12\text{H}_2\text{(g)} = \text{Ag(s)} + \text{HCl(aq)}$ , and  
655 and the standard acidity constant of the ion  $\text{HSO}_4^-$  in synthetic sea water from 273.15 to 318.15  
656 K, *J. Chem. Thermodyn.*, 22(2), 113–127, doi:10.1016/0021-9614(90)90074-Z, 1990.



- 657 Dickson, A. G., Sabine, C. L. and Christian, J. R.: Guide to best practices for ocean CO<sub>2</sub>  
658 measurements, PICES Spec. Publ., 3, pp 191, 2007.
- 659 Dullo, W.-C., Reijmer, J., Schuhmacher, H., Eisenhauer, A., Hassan, M. and Heiss, G.: Holocene  
660 reef growth and recent carbonate production in the Red Sea, [online] Available from:  
661 [https://www.researchgate.net/publication/230751439\\_Holocene\\_reef\\_growth\\_and\\_recent\\_carbo](https://www.researchgate.net/publication/230751439_Holocene_reef_growth_and_recent_carbonate_production_in_the_Red_Sea)  
662 [nate\\_production\\_in\\_the\\_Red\\_Sea](https://www.researchgate.net/publication/230751439_Holocene_reef_growth_and_recent_carbonate_production_in_the_Red_Sea), 1996.
- 663 Eakin, C. M.: A tale of two Enso Events: carbonate budgets and the influence of two warming  
664 disturbances and intervening variability, Uva Island, Panama, Bull. Mar. Sci., 69(1), 171–186,  
665 2001.
- 666 Edgar, G. J., Banks, S. A., Brandt, M., Bustamante, R. H., Chiriboga, A., Earle, S. A., Garske, L.  
667 E., Glynn, P. W., Grove, J. S., Henderson, S., Hickman, C. P., Miller, K. A., Rivera, F. and  
668 Wellington, G. M.: El Niño, grazers and fisheries interact to greatly elevate extinction risk for  
669 Galapagos marine species, Glob. Change Biol., 16(10), 2876–2890, doi:10.1111/j.1365-  
670 2486.2009.02117.x, 2010.
- 671 Edinger, E. N., Limmon, G. V., Jompa, J., Widjatmoko, W., Heikoop, J. M. and Risk, M. J.:  
672 Normal coral growth rates on dying reefs: Are coral growth rates good indicators of reef health?,  
673 Mar. Pollut. Bull., 40(5), 404–425, 2000.
- 674 Enochs, I. C.: Ocean acidification enhances the bioerosion of a common coral reef sponge:  
675 implications for the persistence of the Florida Reef Tract, Bull. Mar. Sci., 91, 271–290,  
676 doi:10.5343/bms.2014.1045, 2015.
- 677 Ezzat, L., Maguer, J.-F., Grover, R. and Ferrier-Pagès, C.: Limited phosphorus availability is the  
678 Achilles heel of tropical reef corals in a warming ocean, Sci. Rep., 6, 31768,  
679 doi:10.1038/srep31768, 2016.
- 680 Fabricius, K. E.: Effects of terrestrial runoff on the ecology of corals and coral reefs: review and  
681 synthesis, Mar. Pollut. Bull., 50(2), 125–146, doi:10.1016/j.marpolbul.2004.11.028, 2005.
- 682 Fang, J. K. H., Mello-Athayde, M. A., Schönberg, C. H. L., Kline, D. I., Hoegh-Guldberg, O.  
683 and Dove, S.: Sponge biomass and bioerosion rates increase under ocean warming and  
684 acidification, Glob. Change Biol., 19(12), 3581–3591, doi:10.1111/gcb.12334, 2013.
- 685 Ferrier-Pagès, C., Godinot, C., D’Angelo, C., Wiedenmann, J. and Grover, R.: Phosphorus  
686 metabolism of reef organisms with algal symbionts, Ecol. Monogr., 86(3), 262–277,  
687 doi:10.1002/ecm.1217, 2016.
- 688 Franco, C., Hepburn, L. A., Smith, D. J., Nimrod, S. and Tucker, A.: A Bayesian Belief Network  
689 to assess rate of changes in coral reef ecosystems, Environ. Model. Softw., 80, 132–142,  
690 doi:10.1016/j.envsoft.2016.02.029, 2016.
- 691 Gattuso, J. P., Epitalon, J. M. and Lavigne: seacarb: seawater carbonate chemistry with R. R  
692 package version 3.0. [online] Available from: <http://CRAN.R-project.org/package=seacarb>,  
693 2015.

- 694 Glynn, P. W.: Bioerosion and coral-reef growth: a dynamic balance, in *Life and Death of Coral*  
695 *Reefs*, edited by C. Birkeland, pp. 68–94, Chapman and Hall, Ney York, USA., 1997.
- 696 Glynn, P. W. and Manzello, D. P.: Bioerosion and Coral Reef Growth: A Dynamic Balance, in  
697 *Coral Reefs in the Anthropocene*, edited by C. Birkeland, pp. 67–97, Springer Netherlands.,  
698 2015.
- 699 Gray, S. E. C., DeGrandpre, M. D., Langdon, C. and Corredor, J. E.: Short-term and seasonal  
700 pH, pCO<sub>2</sub> and saturation state variability in a coral-reef ecosystem, *Glob. Biogeochem. Cycles*,  
701 26(3), doi:10.1029/2011GB004114, 2012.
- 702 Green, A. L. and Bellwood, D. R.: Monitoring functional groups of herbivorous reef fishes as  
703 indicators of coral reef resilience: a practical guide for coral reef managers in the Asia Pacific  
704 region, International Union for Conservation of Nature, IUCN, Gland, Switzerland. [online]  
705 Available from: [ftp://ftp.library.noaa.gov/noaa\\_documents.lib/CoRIS/IUCN\\_herbivorous\\_reef-](ftp://ftp.library.noaa.gov/noaa_documents.lib/CoRIS/IUCN_herbivorous_reef-fishes_2009.pdf)  
706 [fishes\\_2009.pdf](ftp://ftp.library.noaa.gov/noaa_documents.lib/CoRIS/IUCN_herbivorous_reef-fishes_2009.pdf) (Accessed 30 September 2017), 2009.
- 707 Heiss, G. A.: Carbonate production by scleractinian corals at Aqaba, Gulf of Aqaba, Red Sea,  
708 *Facies*, 33(1), 19–34, doi:10.1007/BF02537443, 1995.
- 709 Hoey, A. S. and Bellwood, D. R.: Cross-shelf variation in the role of parrotfishes on the Great  
710 Barrier Reef, *Coral Reefs*, 27(1), 37–47, doi:10.1007/s00338-007-0287-x, 2007.
- 711 Hofmann, G. E., Smith, J. E., Johnson, K. S., Send, U., Levin, L. A., Micheli, F., Paytan, A.,  
712 Price, N. N., Peterson, B., Takeshita, Y., Matson, P. G., Crook, E. D., Kroeker, K. J., Gambi, M.  
713 C., Rivest, E. B., Frieder, C. A., Yu, P. C. and Martz, T. R.: High-Frequency Dynamics of Ocean  
714 pH: A Multi-Ecosystem Comparison, edited by W.-C. Chin, *PLoS ONE*, 6(12), e28983,  
715 doi:10.1371/journal.pone.0028983, 2011.
- 716 Jokieli, P. L. and Coles, S. L.: Response of Hawaiian and other Indo-Pacific reef corals to  
717 elevated temperature, *Coral Reefs*, 8(4), 155–162, doi:10.1007/BF00265006, 1990.
- 718 Jones, N. S., Ridgwell, A. and Hendy, E. J.: Evaluation of coral reef carbonate production  
719 models at a global scale, *Biogeosciences*, 12(5), 1339–1356, doi:10.5194/bg-12-1339-2015,  
720 2015.
- 721 Kattan, A., Coker, D. J. and Berumen, M. L.: Reef fish communities in the central Red Sea show  
722 evidence of asymmetrical fishing pressure, *Mar. Biodivers.*, 1–12, doi:10.1007/s12526-017-  
723 0665-8, 2017.
- 724 Kennedy, E. V., Perry, C. T., Halloran, P. R., Iglesias-Prieto, R., Schönberg, C. H. L., Wisshak,  
725 M., Form, A. U., Carricart-Ganivet, J. P., Fine, M., Eakin, C. M. and Mumby, P. J.: Avoiding  
726 Coral Reef Functional Collapse Requires Local and Global Action, *Curr. Biol.*, 23(10), 912–918,  
727 doi:10.1016/j.cub.2013.04.020, 2013.
- 728 Kleypas, J., Buddemeier, R. and Gattuso, J.-P.: The future of coral reefs in an age of global  
729 change, *Int. J. Earth Sci.*, 90(2), 426–437, doi:10.1007/s005310000125, 2001.

- 730 Kleypas, J. A., McManus, J. W. and Menez, L. A. B.: Environmental Limits to Coral Reef  
731 Development: Where Do We Draw the Line?, *Am. Zool.*, 39, 146–159, 1999.
- 732 Lueker, T. J., Dickson, A. G. and Keeling, C. D.: Ocean pCO<sub>2</sub> calculated from dissolved  
733 inorganic carbon, alkalinity, and equations for K<sub>1</sub> and K<sub>2</sub>: validation based on laboratory  
734 measurements of CO<sub>2</sub> in gas and seawater at equilibrium, *Mar. Chem.*, 70(1–3), 105–119,  
735 doi:10.1016/S0304-4203(00)00022-0, 2000.
- 736 Mallela, J. and Perry, C.: Calcium carbonate budgets for two coral reefs affected by different  
737 terrestrial runoff regimes, Rio Bueno, Jamaica, *Coral Reefs*, 26(1), 129–145,  
738 doi:10.1007/s00338-006-0169-7, 2007.
- 739 Manzello, D. P.: Ocean acidification hotspots: Spatiotemporal dynamics of the seawater CO<sub>2</sub>  
740 system of eastern Pacific coral reefs, *Limnol. Oceanogr.*, 55(1), 239–248,  
741 doi:10.4319/lo.2010.55.1.0239, 2010.
- 742 Manzello, D. P., Kleypas, J. A., Budd, D. A., Eakin, C. M., Glynn, P. W. and Langdon, C.:  
743 Poorly cemented coral reefs of the eastern tropical Pacific: Possible insights into reef  
744 development in a high-CO<sub>2</sub> world, *Proc. Natl. Acad. Sci.*, 105(30), 10450–10455, 2008.
- 745 Marshall, A. T. and Clode, P.: Calcification rate and the effect of temperature in a zooxanthellate  
746 and an azooxanthellate scleractinian reef coral, *Coral Reefs*, 23(2), 218–224,  
747 doi:10.1007/s00338-004-0369-y, 2004.
- 748 Marubini, F., Ferrier-Pagès, C., Furla, P. and Allemand, D.: Coral calcification responds to  
749 seawater acidification: a working hypothesis towards a physiological mechanism, *Coral Reefs*,  
750 27(3), 491–499, doi:10.1007/s00338-008-0375-6, 2008.
- 751 McClanahan, T. R.: Kenyan coral reef lagoon fish: effects of fishing, substrate complexity, and  
752 sea urchins, *Coral Reefs*, 13(4), 231–241, doi:10.1007/BF00303637, 1994.
- 753 McClanahan, T. R. and Shafir, S. H.: Causes and consequences of sea urchin abundance and  
754 diversity in Kenyan coral reef lagoons, *Oecologia*, 83(3), 362–370, doi:10.1007/BF00317561,  
755 1990.
- 756 McClanahan, T. R., Nugues, M. and Mwachireya, S.: Fish and sea urchin herbivory and  
757 competition in Kenyan coral reef lagoons: the role of reef management, *J. Exp. Mar. Biol. Ecol.*,  
758 184(2), 237–254, doi:10.1016/0022-0981(94)90007-8, 1994.
- 759 Metzl, N., Moore, B., Papaud, A. and Poisson, A.: Transport and carbon exchanges in Red Sea  
760 Inverse Methodology, *Glob. Biogeochem. Cycles*, 3(1), 1–26, doi:10.1029/GB003i001p00001,  
761 1989.
- 762 Moberg, F. and Folke, C.: Ecological goods and services of coral reef ecosystems, *Ecol. Econ.*,  
763 29, 215–233, 1999.

- 764 Monroe, A. A., Ziegler, M., Roik, A., Röthig, T., Hardenstin, R., Emms, M., Jensen, T.,  
765 Voolstra, C. R. and Berumen, M. L.: In situ observations of coral bleaching in the central Saudi  
766 Arabian Red Sea during the 2015/2016 global coral bleaching event, PLOS ONE in review.
- 767 Mumby, P. J.: The Impact Of Exploiting Grazers (Scaridae) On The Dynamics Of Caribbean  
768 Coral Reefs, *Ecol. Appl.*, 16(2), 747–769, doi:10.1890/1051-  
769 0761(2006)016[0747:TIOEGS]2.0.CO;2, 2006.
- 770 Orr, J. C., Fabry, V. J., Aumont, O., Bopp, L., Doney, S. C., Feely, R. A., Gnanadesikan, A.,  
771 Gruber, N., Ishida, A., Joos, F., Key, R. M., Lindsay, K., Maier-Reimer, E., Matear, R., Monfray,  
772 P., Mouchet, A., Najjar, R. G., Plattner, G.-K., Rodgers, K. B., Sabine, C. L., Sarmiento, J. L.,  
773 Schlitzer, R., Slater, R. D., Totterdell, I. J., Weirig, M.-F., Yamanaka, Y. and Yool, A.:  
774 Anthropogenic ocean acidification over the twenty-first century and its impact on calcifying  
775 organisms, *Nature*, 437(7059), 681–686, doi:10.1038/nature04095, 2005.
- 776 Pari, N., Peyrot-Clausade, M., Le Champion-Alsumard, T., Hutchings, P., Chazottes, V.,  
777 Gobulic, S., Le Champion, J. and Fontaine, M. F.: Bioerosion of experimental substrates on high  
778 islands and on atoll lagoons (French Polynesia) after two years of exposure, *Mar. Ecol. Prog.*  
779 *Ser.*, 166, 119–130, 1998.
- 780 Perez, F. F. and Fraga, F.: The pH measurements in seawater on the NBS scale, *Mar. Chem.*,  
781 21(4), 315–327, doi:10.1016/0304-4203(87)90054-5, 1987.
- 782 Perry, C., Edinger, E., Kench, P., Murphy, G., Smithers, S., Steneck, R. and Mumby, P.:  
783 Estimating rates of biologically driven coral reef framework production and erosion: a new  
784 census-based carbonate budget methodology and applications to the reefs of Bonaire, *Coral*  
785 *Reefs*, 31(3), 853–868, doi:10.1007/s00338-012-0901-4, 2012.
- 786 Perry, C. T. and Larcombe, P.: Marginal and non-reef-building coral environments, *Coral Reefs*,  
787 22(4), 427–432, doi:10.1007/s00338-003-0330-5, 2003.
- 788 Perry, C. T., Spencer, T. and Kench, P. S.: Carbonate budgets and reef production states: a  
789 geomorphic perspective on the ecological phase-shift concept, *Coral Reefs*, 27(4), 853–866,  
790 doi:10.1007/s00338-008-0418-z, 2008.
- 791 Perry, C. T., Murphy, G. N., Kench, P. S., Smithers, S. G., Edinger, E. N., Steneck, R. S. and  
792 Mumby, P. J.: Caribbean-wide decline in carbonate production threatens coral reef growth, *Nat.*  
793 *Commun.*, 4, 1402, doi:10.1038/ncomms2409, 2013.
- 794 Perry, C. T., Murphy, G. N., Kench, P. S., Edinger, E. N., Smithers, S. G., Steneck, R. S. and  
795 Mumby, P. J.: Changing dynamics of Caribbean reef carbonate budgets: emergence of reef  
796 bioeroders as critical controls on present and future reef growth potential, *Proc. R. Soc. B Biol.*  
797 *Sci.*, 281(1796), 20142018–20142018, doi:10.1098/rspb.2014.2018, 2014.
- 798 Perry, C. T., Murphy, G. N., Graham, N. A. J., Wilson, S. K., Januchowski-Hartley, F. A. and  
799 East, H. K.: Remote coral reefs can sustain high growth potential and may match future sea-level  
800 trends, *Sci. Rep.*, 5, 18289, doi:10.1038/srep18289, 2015.

- 801 Pogoreutz, C., Rådecker, N., Cárdenas, A., Gärdes, A., Voolstra, C. R. and Wild, C.: Sugar  
802 enrichment provides evidence for a role of nitrogen fixation in coral bleaching, *Glob. Change*  
803 *Biol.*, n/a-n/a, doi:10.1111/gcb.13695, 2017.
- 804 R Core Team: R: A language and environment for statistical computing, R Foundation for  
805 Statistical Computing, Vienna, Austria. [online] Available from: <http://www.R-project.org/>,  
806 2013.
- 807 Rådecker, N., Pogoreutz, C., Voolstra, C. R., Wiedenmann, J. and Wild, C.: Nitrogen cycling in  
808 corals: the key to understanding holobiont functioning?, *Trends Microbiol.*,  
809 doi:10.1016/j.tim.2015.03.008, 2015.
- 810 Raitsos, D. E., Hoteit, I., Prihartato, P. K., Chronis, T., Triantafyllou, G. and Abualnaja, Y.:  
811 Abrupt warming of the Red Sea, *Geophys. Res. Lett.*, 38(14), L14601,  
812 doi:10.1029/2011GL047984, 2011.
- 813 Raitsos, D. E., Pradhan, Y., Brewin, R. J. W., Stenchikov, G. and Hoteit, I.: Remote Sensing the  
814 Phytoplankton Seasonal Succession of the Red Sea, *PLoS ONE*, 8(6), e64909,  
815 doi:10.1371/journal.pone.0064909, 2013.
- 816 Reaka-Kudla, M. L.: The Global Biodiversity of Coral Reefs: A Comparison with Rainforests, in  
817 *Biodiversity II: Understanding and Protecting Our Biological Resources*, edited by M. L. Reaka-  
818 Kudla, D. E. Wilson, and E. O. Wilson, pp. 83–106, The Joseph Henry Press, USA., 1997.
- 819 Riegl, B.: Climate change and coral reefs: different effects in two high-latitude areas (Arabian  
820 Gulf, South Africa), *Coral Reefs*, 22(4), 433–446, doi:10.1007/s00338-003-0335-0, 2003.
- 821 Riegl, B. M., Bruckner, A. W., Rowlands, G. P., Purkis, S. J. and Renaud, P.: Red Sea Coral  
822 Reef Trajectories over 2 Decades Suggest Increasing Community Homogenization and Decline  
823 in Coral Size, *PLoS ONE*, 7(5), e38396, doi:10.1371/journal.pone.0038396, 2012.
- 824 Roik, A., Roder, C., Röthig, T. and Voolstra, C. R.: Spatial and seasonal reef calcification in  
825 corals and calcareous crusts in the central Red Sea, *Coral Reefs*, 1–13, doi:10.1007/s00338-015-  
826 1383-y, 2015.
- 827 Roik, A., Röthig, T., Roder, C., Ziegler, M., Kremb, S. G. and Voolstra, C. R.: Year-Long  
828 Monitoring of Physico-Chemical and Biological Variables Provide a Comparative Baseline of  
829 Coral Reef Functioning in the Central Red Sea, *PLOS ONE*, 11(11), e0163939,  
830 doi:10.1371/journal.pone.0163939, 2016.
- 831 Sawall, Y. and Al-Sofyani, A.: Biology of Red Sea Corals: Metabolism, Reproduction,  
832 Acclimatization, and Adaptation, in *The Red Sea*, edited by N. M. A. Rasul and I. C. F. Stewart,  
833 pp. 487–509, Springer Berlin Heidelberg. [online] Available from:  
834 [http://link.springer.com/chapter/10.1007/978-3-662-45201-1\\_28](http://link.springer.com/chapter/10.1007/978-3-662-45201-1_28) (Accessed 7 April 2015), 2015.
- 835 Sawall, Y., Al-Sofyani, A., Hohn, S., Banguera-Hinestroza, E., Voolstra, C. R. and Wahl, M.:  
836 Extensive phenotypic plasticity of a Red Sea coral over a strong latitudinal temperature gradient

- 837 suggests limited acclimatization potential to warming, *Sci. Rep.*, 5, 8940,  
838 doi:10.1038/srep08940, 2015.
- 839 Schmidt, G. M. and Richter, C.: Coral Growth and Bioerosion of *Porites lutea* in Response to  
840 Large Amplitude Internal Waves, *PLoS ONE*, 8(12), e73236, doi:10.1371/journal.pone.0073236,  
841 2013.
- 842 Schneider, K. and Erez, J.: The effect of carbonate chemistry on calcification and photosynthesis  
843 in the hermatypic coral *Acropora eurystroma*, *Limnol. Oceanogr.*, 51(3), 1284–1293, 2006.
- 844 Schuhmacher, H., Loch, K., Loch, W. and See, W. R.: The aftermath of coral bleaching on a  
845 Maldivian reef—a quantitative study, *Facies*, 51(1–4), 80–92, doi:10.1007/s10347-005-0020-6,  
846 2005.
- 847 Sheppard, C. and Loughland, R.: Coral mortality and recovery in response to increasing  
848 temperature in the southern Arabian Gulf, *Aquat. Ecosyst. Health Manag.*, 5(4), 395–402,  
849 doi:10.1080/14634980290002020, 2002.
- 850 Silbiger, N. J., Guadayol, O., Thomas, F. I. M. and Donahue, M. J.: Reefs shift from net  
851 accretion to net erosion along a natural environmental gradient, *Mar. Ecol. Prog. Ser.*, 515, 33–  
852 44, doi:10.3354/meps10999, 2014.
- 853 Silverman, J., Lazar, B. and Erez, J.: Community metabolism of a coral reef exposed to naturally  
854 varying dissolved inorganic nutrient loads, *Biogeochemistry*, 84(1), 67–82, doi:10.1007/s10533-  
855 007-9075-5, 2007.
- 856 Steiner, Z., Erez, J., Shemesh, A., Yam, R., Katz, A. and Lazar, B.: Basin-scale estimates of  
857 pelagic and coral reef calcification in the Red Sea and Western Indian Ocean, *Proc. Natl. Acad.  
858 Sci.*, 1414323111, doi:10.1073/pnas.1414323111, 2014.
- 859 Tambutté, S., Holcomb, M., Ferrier-Pagès, C., Reynaud, S., Tambutté, É., Zoccola, D. and  
860 Allemand, D.: Coral biomineralization: From the gene to the environment, *J. Exp. Mar. Biol.  
861 Ecol.*, 408(1–2), 58–78, doi:10.1016/j.jembe.2011.07.026, 2011.
- 862 Tribollet, A. and Golubic, S.: Cross-shelf differences in the pattern and pace of bioerosion of  
863 experimental carbonate substrates exposed for 3 years on the northern Great Barrier Reef,  
864 Australia, *Coral Reefs*, 24(3), 422–434, doi:10.1007/s00338-005-0003-7, 2005.
- 865 Tribollet, A., Decherf, G., Hutchings, P. and Peyrot-Clausade, M.: Large-scale spatial variability  
866 in bioerosion of experimental coral substrates on the Great Barrier Reef (Australia): importance  
867 of microborers, *Coral Reefs*, 21(4), 424–432, doi:10.1007/s00338-002-0267-0, 2002.
- 868 Tribollet, A., Godinot, C., Atkinson, M. and Langdon, C.: Effects of elevated pCO<sub>2</sub> on  
869 dissolution of coral carbonates by microbial euendoliths, *Glob. Biogeochem. Cycles*, 23(3),  
870 doi:10.1029/2008GB003286, 2009.

- 871 Uthicke, S., Furnas, M. and Lønborg, C.: Coral Reefs on the Edge? Carbon Chemistry on Inshore  
872 Reefs of the Great Barrier Reef, PLoS ONE, 9(10), e109092, doi:10.1371/journal.pone.0109092,  
873 2014.
- 874 Vaquer-Sunyer, R. and Duarte, C. M.: Thresholds of hypoxia for marine biodiversity, Proc. Natl.  
875 Acad. Sci., 105(40), 15452–15457, doi:10.1073/pnas.0803833105, 2008.
- 876 Waldbusser, G. G., Hales, B. and Haley, B. A.: Calcium carbonate saturation state: on myths and  
877 this or that stories, ICES J. Mar. Sci. J. Cons., 73(3), 563–568, doi:10.1093/icesjms/fsv174,  
878 2016.
- 879 Wickham, H. and Chang, W.: ggplot2: An Implementation of the Grammar of Graphics. [online]  
880 Available from: <http://cran.r-project.org/web/packages/ggplot2/index.html> (Accessed 25 June  
881 2015), 2015.
- 882 Wiedenmann, J., D'Angelo, C., Smith, E. G., Hunt, A. N., Legiret, F.-E., Postle, A. D. and  
883 Achterberg, E. P.: Nutrient enrichment can increase the susceptibility of reef corals to bleaching,  
884 Nat. Clim. Change, 3(2), 160–164, doi:10.1038/nclimate1661, 2013.
- 885 Yeakel, K. L., Andersson, A. J., Bates, N. R., Noyes, T. J., Collins, A. and Garley, R.: Shifts in  
886 coral reef biogeochemistry and resulting acidification linked to offshore productivity, Proc. Natl.  
887 Acad. Sci., 112(47), 14512–14517, doi:10.1073/pnas.1507021112, 2015.
- 888 Zundevich, A., Lazar, B. and Ilan, M.: Chemical versus mechanical bioerosion of coral reefs  
889 by boring sponges - lessons from *Pione cf. vastifica*, J. Exp. Biol., 210(1), 91–96,  
890 doi:10.1242/jeb.02627, 2007.
- 891

892 **Tables**

893

894 **Table 1. Abiotic parameters relevant for reef growth at coral reef sites along a cross-shelf**  
 895 **gradient in the central Red Sea.** Temperature (Temp) and pH were continuously measured  
 896 using *in situ* probes (CTDs). Weekly collected seawater samples were used for the determination  
 897 of inorganic nutrient concentrations, i.e. nitrate and nitrite ( $\text{NO}_3^-$  &  $\text{NO}_2^-$ ), ammonia ( $\text{NH}_4^+$ ), and  
 898 phosphate ( $\text{PO}_4^{3-}$ ). Carbonate chemistry parameters were measured as total alkalinity ( $A_T$ ) and  
 899 pH in the same samples and used to calculate the carbonate ion concentration ( $\text{CO}_3^{2-}$ ), aragonite  
 900 saturation state ( $\Omega_a$ ), total inorganic carbon ( $C_T$ ), bicarbonate ion ( $\text{HCO}_3^-$ ), and partial pressure of  
 901 carbon dioxide ( $p\text{CO}_2$ ).

| Site / Season               | Continuous data |                   | Seawater samples                  |                        |                        |                   |                        |                         |                         |                |                         |                  |
|-----------------------------|-----------------|-------------------|-----------------------------------|------------------------|------------------------|-------------------|------------------------|-------------------------|-------------------------|----------------|-------------------------|------------------|
|                             | Temp            | pH <sub>CTD</sub> | $\text{NO}_3^-$ & $\text{NO}_2^-$ | $\text{NH}_4^+$        | $\text{PO}_4^{3-}$     | pH <sub>SWS</sub> | $A_T$                  | $\text{HCO}_3^-$ *      | $\text{CO}_3^{2-*}$     | $\Omega_a^*$   | $C_T^*$                 | $p\text{CO}_2^*$ |
|                             | °C              |                   | $\mu\text{mol L}^{-1}$            | $\mu\text{mol L}^{-1}$ | $\mu\text{mol L}^{-1}$ |                   | $\mu\text{mol L}^{-1}$ | $\mu\text{mol kg}^{-1}$ | $\mu\text{mol kg}^{-1}$ |                | $\mu\text{mol kg}^{-1}$ | $\mu\text{atm}$  |
| Avg. winter                 | 26.0<br>(0.6)   | 8.13<br>(0.19)    | 0.36<br>(0.25)                    | 0.35<br>(0.2)          | 0.07<br>(0.02)         | 8.16<br>(0.02)    | 2423<br>(18)           | 1683<br>(24)            | 299<br>(7)              | 4.62<br>(0.12) | 1990<br>(21)            | 292<br>(14)      |
| Avg. summer                 | 31.0<br>(0.7)   | 8.15<br>(0.19)    | 0.61<br>(0.25)                    | 0.5<br>(0.22)          | 0.03<br>(0.02)         | 8.13<br>(0.03)    | 2369<br>(38)           | 1588<br>(41)            | 314<br>(17)             | 4.95<br>(0.28) | 1910<br>(36)            | 303<br>(25)      |
| Nearshore exposed / winter  | 26.1<br>(0.7)   | 8.25<br>(0.27)    | 0.31<br>(0.17)                    | 0.34<br>(0.19)         | 0.06<br>(0.02)         | 8.15<br>(0.02)    | 2414<br>(21)           | 1678<br>(36)            | 297<br>(6)              | 4.6<br>(0.11)  | 1983<br>(31)            | 295<br>(16)      |
| Nearshore exposed / summer  | 31.5<br>(0.6)   | 8.31<br>(0.12)    | 0.6<br>(0.28)                     | 0.42<br>(0.17)         | 0.02<br>(0.01)         | 8.11<br>(0.03)    | 2346<br>(31)           | 1576<br>(37)            | 309<br>(14)             | 4.88<br>(0.23) | 1892<br>(32)            | 311<br>(22)      |
| Midshore sheltered / winter | 25.9<br>(0.6)   | 8.00<br>(0.17)    | 0.41<br>(0.31)                    | 0.46<br>(0.28)         | 0.07<br>(0.02)         | 8.15<br>(0.02)    | 2421<br>(21)           | 1695<br>(19)            | 294<br>(10)             | 4.54<br>(0.14) | 1997<br>(16)            | 301<br>(17)      |
| Midshore sheltered / summer | 30.9<br>(0.6)   | 8.09<br>(0.22)    | 0.68<br>(0.26)                    | 0.58<br>(0.28)         | 0.04<br>(0.03)         | 8.11<br>(0.03)    | 2365<br>(40)           | 1603<br>(47)            | 306<br>(18)             | 4.83<br>(0.29) | 1917<br>(40)            | 315<br>(31)      |
| Midshore exposed / winter   | 26.1<br>(0.5)   | 8.15<br>(0.07)    | 0.32<br>(0.3)                     | 0.34<br>(0.19)         | 0.06<br>(0.02)         | 8.17<br>(0.02)    | 2431<br>(14)           | 1679<br>(27)            | 304<br>(8)              | 4.7<br>(0.13)  | 1991<br>(21)            | 286<br>(15)      |
| Midshore exposed / summer   | 30.7<br>(0.7)   | 8.16<br>(0.09)    | 0.58<br>(0.26)                    | 0.5<br>(0.26)          | 0.02<br>(0.01)         | 8.13<br>(0.02)    | 2373<br>(38)           | 1594<br>(37)            | 313<br>(15)             | 4.93<br>(0.24) | 1915<br>(34)            | 300<br>(16)      |
| Offshore exposed / winter   | 26.0<br>(0.4)   | 8.10<br>(0.05)    | 0.4<br>(0.24)                     | 0.26<br>(0.15)         | 0.08<br>(0.02)         | 8.16<br>(0.01)    | 2425<br>(20)           | 1679<br>(18)            | 302<br>(2)              | 4.66<br>(0.03) | 1988<br>(19)            | 285<br>(5)       |
| Offshore exposed / summer   | 30.8<br>(0.7)   | 8.12<br>(0.08)    | 0.59<br>(0.25)                    | 0.51<br>(0.18)         | 0.03<br>(0.03)         | 8.15<br>(0.02)    | 2393<br>(35)           | 1579<br>(47)            | 328<br>(16)             | 5.17<br>(0.26) | 1914<br>(39)            | 283<br>(19)      |

902 All values as mean (SD); pH<sub>CTD</sub> = pH from CTD; pH<sub>SWS</sub> = pH from seawater samples # day-  
 903 time measurements (7:00 – 19:00); \* parameters calculated using *seacarb* implemented in R  
 904 (Gattuso et al., 2015; R Core Team, 2013)



905 **Table 2. Net-accretion/erosion rates  $G_{\text{net}}$  in coral reefs along a cross-shelf gradient in the**  
906 **central Red Sea, cumulative over 6, 12, and 30 months.**  $G_{\text{net}}$  ( $\text{kg m}^{-2} \text{yr}^{-1}$ ) was calculated using  
907 weight gain/loss of limestone blocks deployed in the reef sites for 6, 12, and 30 months. Means  
908 per reef site and standard deviations in brackets. yr = year

| $G_{\text{net}}$ ( $\text{kg m}^{-2} \text{yr}^{-1}$ ) | Deployment time (months) |              |              |
|--------------------------------------------------------|--------------------------|--------------|--------------|
| Reef site                                              | 6                        | 12           | 30           |
| Nearshore sheltered                                    | 0.16 (0.09)              | -0.2 (0.35)  | -            |
| Nearshore exposed                                      | 0.11 (0.07)              | -0.61 (0.49) | -0.96 (0.75) |
| Midshore sheltered                                     | 0.13 (0.09)              | 0.06 (0.03)  | -0.29 (0.12) |
| Midshore exposed                                       | 0.11 (0.16)              | 0.01 (0.07)  | 0.06 (0.12)  |
| Offshore sheltered                                     | 0.03 (0.02)              | -0.07 (0.07) | -            |
| Offshore exposed                                       | 0.14 (0.11)              | 0.08 (0.09)  | 0.37 (0.08)  |

909

910 **Table 3. Reef carbonate budget estimates and contributing biotic variables ( $\text{kg m}^{-2} \text{yr}^{-1}$ )**  
911 **along a cross-shelf gradient in the central Red Sea.** Calcification rates of benthic calcifiers  
912 ( $G_{\text{benthos}}$ ), net-accretion/erosion rates of reef substrate ( $G_{\text{netbenthos}}$ ), and the erosion rates of  
913 echinoids and parrotfishes ( $E_{\text{echino}}$ ,  $E_{\text{parrot}}$ ) contribute to the total carbonate budget ( $G_{\text{budget}}$ ) in a  
914 reef site. Means per site are shown and standard deviations are in brackets. The last row gives the  
915 means and standard deviations across all sites.

| Reef                 | $G_{\text{budget}}$ | $G_{\text{benthos}}$ | $G_{\text{netbenthos}}$ | $E_{\text{echino}}$ | $E_{\text{parrot}}$ |
|----------------------|---------------------|----------------------|-------------------------|---------------------|---------------------|
| Nearshore exposed    | -1.477 (1.748)      | 0.426 (0.149)        | -0.315 (0.129)          | -0.228 (0.189)      | -1.36 (1.886)       |
| Midshore sheltered   | 0.598 (0.368)       | 1.15 (0.222)         | -0.027 (0.014)          | -0.187 (0.193)      | -0.338 (0.271)      |
| Midshore exposed     | 1.02 (0.353)        | 1.762 (0.242)        | 0.009 (0.003)           | -0.024 (0.04)       | -0.727 (0.307)      |
| Offshore exposed     | 2.443 (1.033)       | 2.812 (0.646)        | 0.094 (0.022)           | -0.019 (0.003)      | -0.444 (0.701)      |
| Cross-shelf gradient | 0.646 (1.734)       | 1.538 (0.958)        | -0.06 (0.168)           | -0.114 (0.159)      | -0.717 (1.04)       |

916

917 **Table 4. Coefficients from Spearman rank order correlations for predictor variables vs.**  
 918  **$G_{net}$  and  $G_{budget}$ .** 12 abiotic and 13 biotic variables were correlated with  $G_{net}$  (= net-  
 919 accretion/erosion rates of limestone blocks) and  $G_{budget}$  (= carbonate budget estimates). Biotic  
 920 variables encompassed the abundances of bioeroders (echinoids, parrotfishes), and 11 relevant  
 921 benthic categories (%-cover). Correlates only shown, when Spearman's correlation coefficient  $\rho$   
 922  $\geq |0.59|$ .

| <u>Abiotic variables</u> | $G_{net}$ |        | $G_{budget}$ |        |
|--------------------------|-----------|--------|--------------|--------|
|                          | $\rho$    | $p$    | $\rho$       | $p$    |
| Temperature(ctd) mean    | -0.65     | < 0.05 | -0.71        | < 0.05 |
| Temperature(ctd) SD      | -0.65     | < 0.05 | -0.71        | < 0.05 |
| pH(ctd) SD               | -0.59     | < 0.05 | -0.65        | < 0.05 |
| $A_T$ mean               | 0.80      | < 0.05 | 0.89         | < 0.05 |
| $\Omega_a$ mean          | 0.59      | < 0.05 | 0.65         | < 0.05 |
| $CO_3^{2-}$ mean         | 0.59      | < 0.05 | 0.65         | < 0.05 |
| $PO_4^{3-}$ mean         | 0.65      | < 0.05 | 0.71         | < 0.05 |
| <u>Biotic variables</u>  | $\rho$    | $p$    | $\rho$       | $p$    |
| Rugosity                 | -         | -      | 0.67         | < 0.05 |
| % total hard coral       | -         | -      | 0.70         | < 0.05 |
| % calcareous crusts      | 0.59      | < 0.05 | 0.69         | < 0.05 |

923

924

925 **Table 5. Distance based linear models (DistLM) and sequential tests.** Response variables  
 926 were  $G_{\text{net}}$  (net-accretion/erosion rates of limestone blocks) and  $G_{\text{budget}}$  (reef carbonate budget  
 927 estimates). Predictor variables were 12 abiotic variables, bioeroder abundances (one variable for  
 928  $G_{\text{net}}$ , two for  $G_{\text{budget}}$ ), and %-cover of relevant benthic categories (one for  $G_{\text{net}}$ , 11 for  $G_{\text{budget}}$ ).  
 929 Significant predictors in **bold**.

| Response variable: $G_{\text{net}}$         |                   |              |              |                       |             |              |           |
|---------------------------------------------|-------------------|--------------|--------------|-----------------------|-------------|--------------|-----------|
| <b>Best Model</b>                           | Adj $R^2$         | $R^2$        | RSS          | # of fitted Variables |             |              |           |
|                                             | 0.56              | 0.59         | 3.21         | 2                     |             |              |           |
| <u>Sequential test</u>                      |                   |              |              |                       |             |              |           |
| Variable                                    | Cumul. Adj $R^2$  | SS (trace)   | Pseudo-F     | $p$                   | $R^2$       | Cumul. $R^2$ | res.df    |
| + $A_T$ mean                                | <b>0.54</b>       | <b>4.39</b>  | <b>37.84</b> | <b>0.00</b>           | <b>0.56</b> | <b>0.56</b>  | <b>30</b> |
| + $\Omega_a$ mean                           | 0.56              | 0.27         | 2.48         | 0.12                  | 0.03        | 0.59         | 29        |
| Response variables: $G_{\text{budget}}$     |                   |              |              |                       |             |              |           |
| <b>Best Model</b>                           | Adj $R^2$         | $R^2$        | RSS          | # of fitted Variables |             |              |           |
|                                             | 0.87              | 0.9          | 6.67         | 6                     |             |              |           |
| <u>Sequential test</u>                      |                   |              |              |                       |             |              |           |
| Variable                                    | Cumul. Adj. $R^2$ | SS (trace)   | Pseudo-F     | $p$                   | $R^2$       | Cumul. $R^2$ | res.df    |
| + $A_T$ (mean)                              | <b>0.65</b>       | <b>46.18</b> | <b>44.13</b> | <b>0.000</b>          | <b>0.67</b> | <b>0.67</b>  | <b>22</b> |
| +Parrotfish abundance                       | <b>0.82</b>       | <b>11.75</b> | <b>21.89</b> | <b>0.000</b>          | <b>0.17</b> | <b>0.84</b>  | <b>21</b> |
| +NO <sub>3</sub> -&NO <sub>2</sub> - (mean) | 0.84              | 1.67         | 3.48         | 0.078                 | 0.02        | 0.86         | 20        |
| +% encrusting coral                         | 0.85              | 1.27         | 2.89         | 0.102                 | 0.02        | 0.88         | 19        |
| +% hard coral                               | 0.86              | 0.80         | 1.91         | 0.181                 | 0.01        | 0.89         | 18        |
| +% Acroporidae                              | 0.87              | 0.86         | 2.19         | 0.154                 | 0.01        | 0.90         | 17        |

930 Cumul. Adj.  $R^2$  = Cumulative adjusted  $R^2$ , Cumul.  $R^2$  = Cumulative  $R^2$ , res.df = residual degrees  
 931 of freedom,  $A_T$  = total alkalinity

932 **Table 6. Global comparison of the carbonate system for coral reefs.**

|                                                                          | $A_T$ ( $\mu\text{mol kg}^{-1}$ ) | $\Omega_a$ | $p\text{CO}_2$ ( $\mu\text{atm}$ ) |
|--------------------------------------------------------------------------|-----------------------------------|------------|------------------------------------|
| <b>Central Red Sea</b> (this study) <sup>1</sup>                         | 2346 – 2431                       | 4.5 - 5.2  | 283 – 315                          |
| <b>Global pre-industrial values</b> (Manzello et al., 2008) <sup>2</sup> | ~2315                             | ~4.3       | ~280                               |
| <b>Great Barrier Reef</b> (Uthicke et al., 2014) <sup>3</sup>            | 2069 – 2315                       | 2.6 - 3.8  | 340 - 554                          |
| <b>Puerto Rico, Caribbean</b> (Gray et al., 2012) <sup>4</sup>           | 2223 - 2315                       | 3.4– 3.9   | 356 – 460                          |
| <b>Bermuda</b> (Yeakel et al., 2015) <sup>5</sup>                        | 2300 – 2400                       | 2.7 - 3.6  | 300 -450                           |
| <b>Panama, upwelling sites</b> (Manzello et al., 2008) <sup>2</sup>      | 1869.5                            | 2.96       | 368                                |
| <b>Galapagos</b> (Manzello et al., 2008) <sup>2</sup>                    | 2299                              | 2.49       | 636                                |

933 <sup>1</sup> lowest and highest means per reef site and season; <sup>2</sup> estimated averages, for details see  
 934 referenced study; <sup>3</sup> lowest and highest means from reef sites during wet and dry seasons; <sup>4</sup>  
 935 lowest and highest seasonal means from one site; <sup>5</sup> minimum and maximum from time series  
 936 plots

937 **Figures**

938

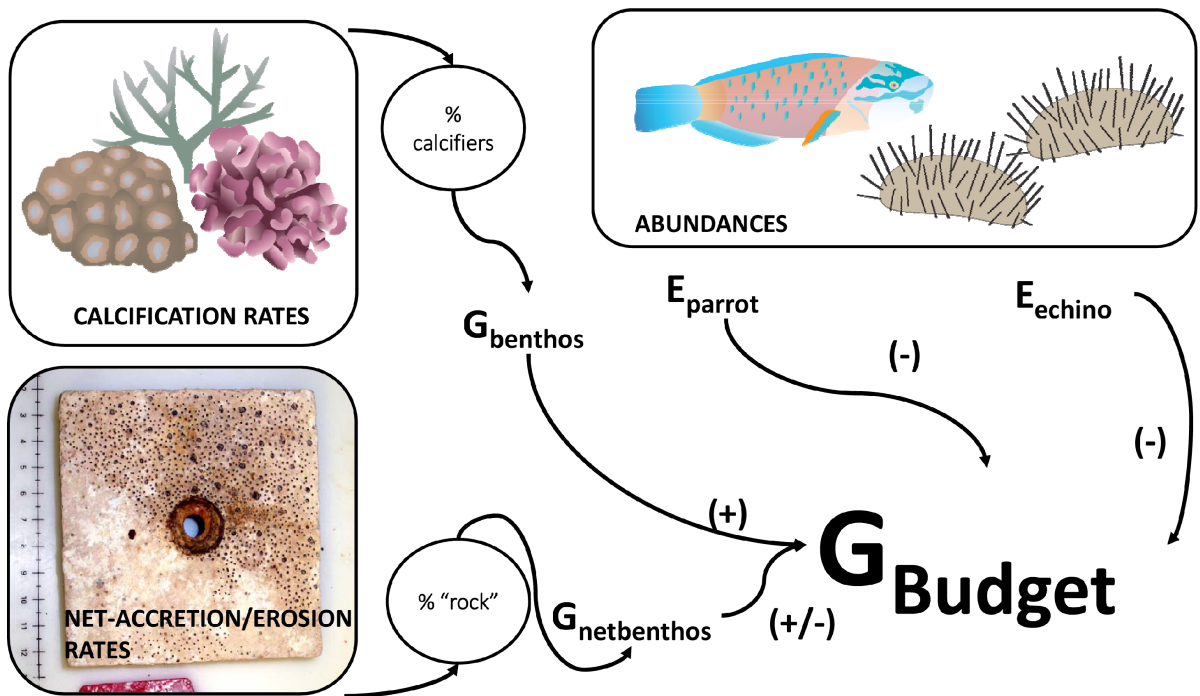

939  
940

941 **Figure 1. Schematic overview of the census based *ReefBudget* carbonate budget ( $G_{\text{budget}}$ )**  
942 **approach (adapted from Perry et al., 2012).** Values and equations that were used are available  
943 as Supplementary Materials.  $G_{\text{benthos}}$  = benthic community calcification rate,  $G_{\text{netbenthos}}$  = net-  
944 accretion/erosion rate of bare reef substrate,  $E_{\text{parrot}}$  = parrotfish erosion rate,  $E_{\text{echino}}$  = echinoid  
945 (sea urchin) erosion rate,  $G_{\text{budget}}$  = carbonate budget of a reef. Images from [www.ian.umces.edu](http://www.ian.umces.edu).

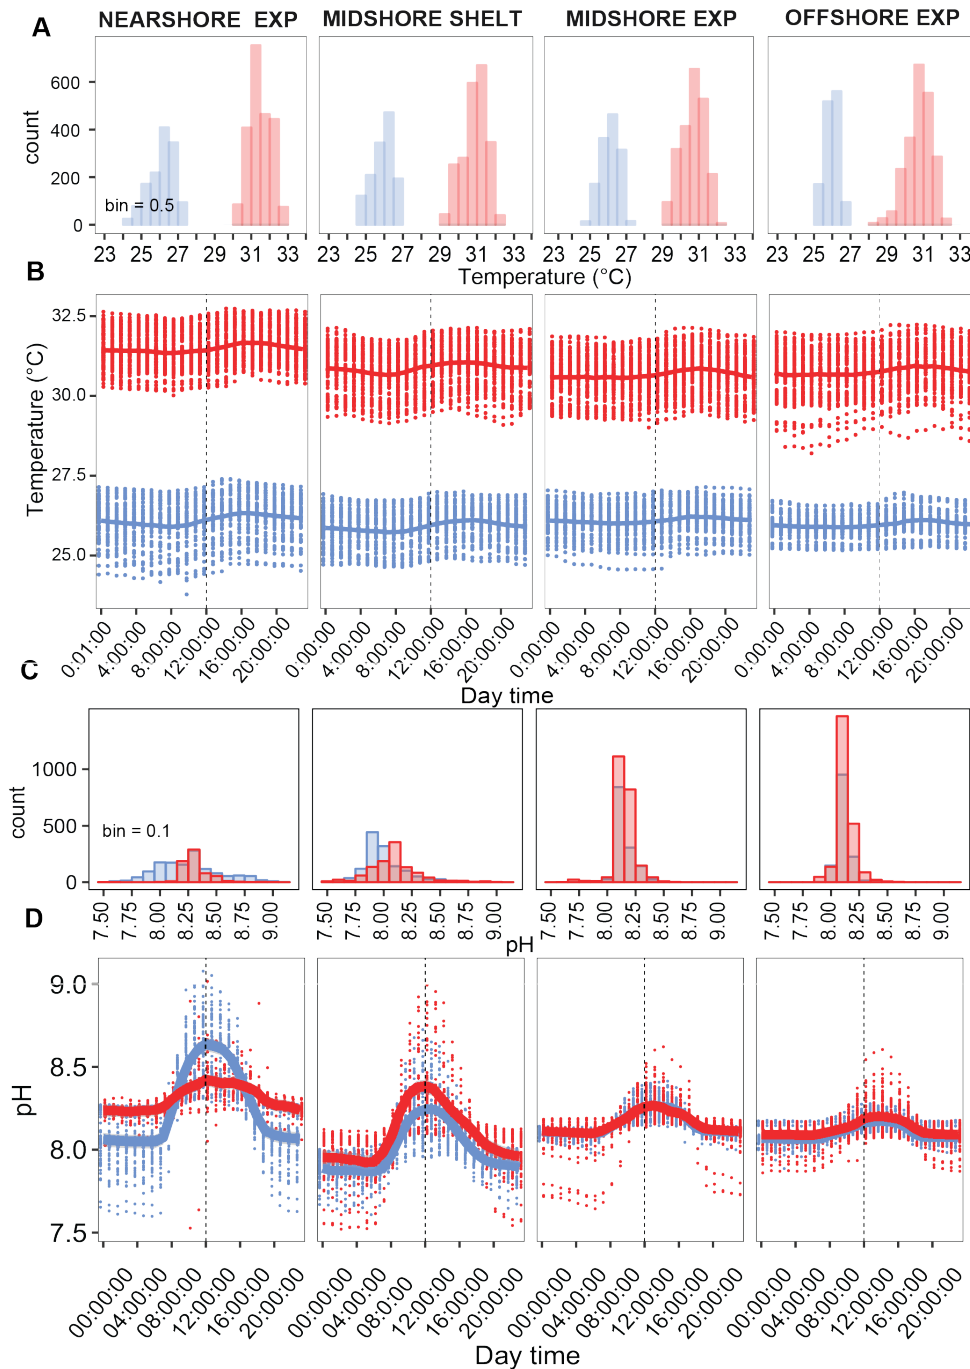

946

947 **Figure 2. Seasonal temperature and pH regimes on coral reefs along a cross-shelf gradient**  
 948 **in the central Red Sea.** Continuous data of temperature (A - B) and pH<sub>CTD</sub> (C - D)  
 949 during winter (blue) and summer (red) at 0.5 m above the reef are presented in histograms (A, C)  
 950 and diel profiles (B, D). Data points per reef site in winter comprise n = 1287 - 1344, and n =  
 951 1099 - 2231 in summer (nearshore summer n = 644). Diel profiles show raw data points and  
 952 local polynomial regression lines (LOESS, span = 0.1). A dotted vertical line marks the midday  
 953 time. EXP = exposed, SHELTER = sheltered, univar. = univariate, n.s. = not significant, SD =  
 954 standard deviation, min = minimum, max = maximum

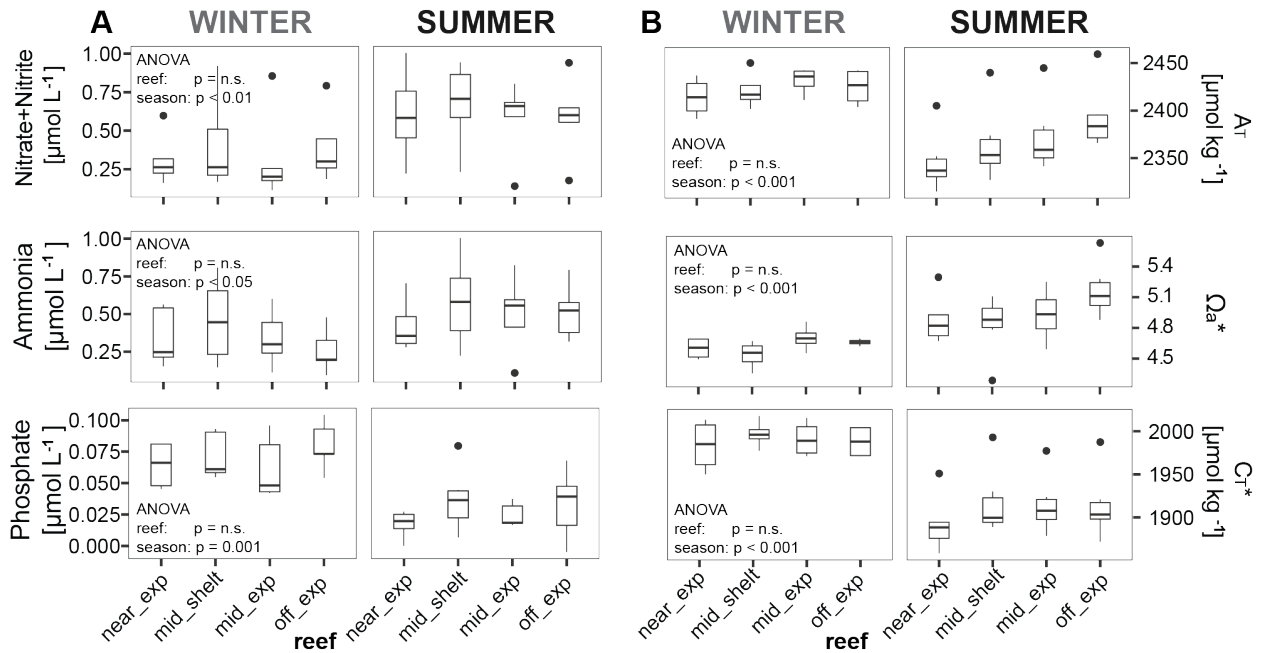

955

956 **Figure 3. Inorganic nutrients and carbonate system conditions across reef sites and**  
 957 **seasons in the central Red Sea.** Boxplots illustrate the differences of seawater parameters  
 958 between the reefs within each season (box: 1st and 3rd quartiles, whiskers: 1.5-fold inter-quartile  
 959 range, points: data beyond this range).  $A_T$  = total alkalinity,  $\Omega_a$  = aragonite saturation state,  $C_T$  =  
 960 total inorganic carbon; off = offshore, mid = midshore, near = nearshore, exp = exposed fore reef,  
 961 shelt = sheltered lagoon, n.s. = not significant



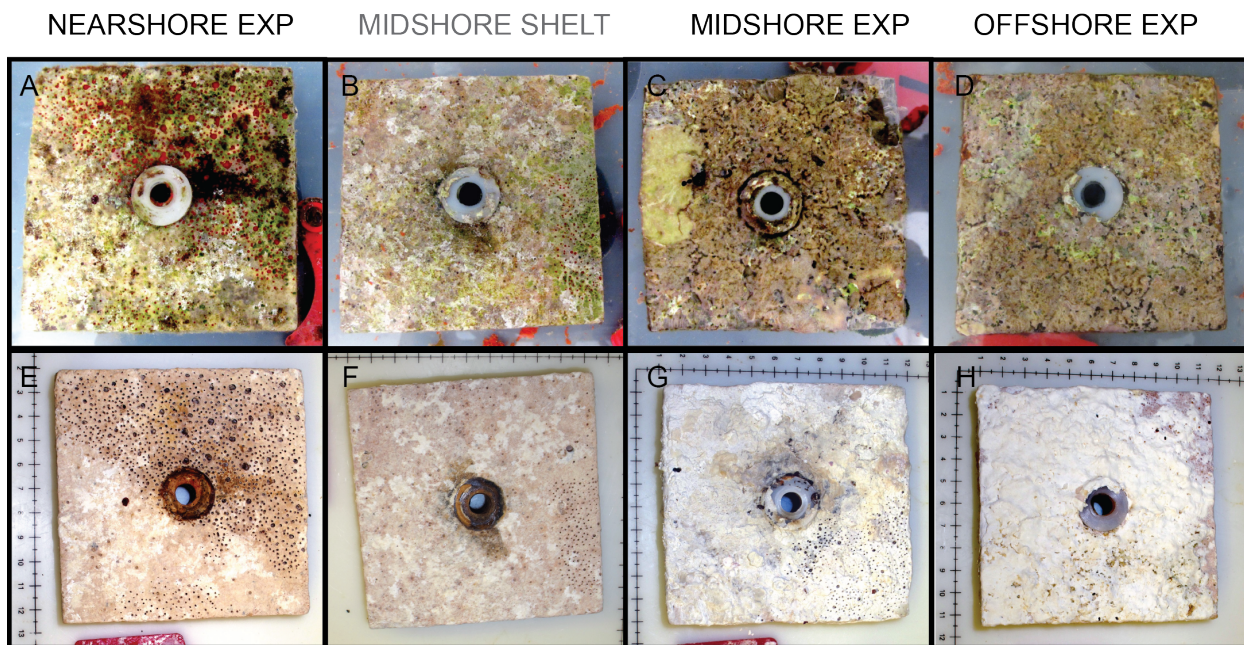

962

963 **Figure 4. Limestone blocks after 30 months of deployment in the reef sites for**  
964 **measurements of net-accretion/erosion rates  $G_{net}$ .** A – D show freshly collected limestone  
965 blocks that were recovered after 30 months, and the same blocks (E – H) after bleaching and  
966 drying. Boring holes of endolithic sponges are clearly visible in the nearshore exposed and both  
967 midshore reef sites. In the midshore and offshore exposed reefs, blocks were covered with crusts  
968 of biogenic carbonate mostly accreted by coralline algae assemblages. EXP = exposed, SHELTER =  
969 sheltered, scales in E – H in cm.

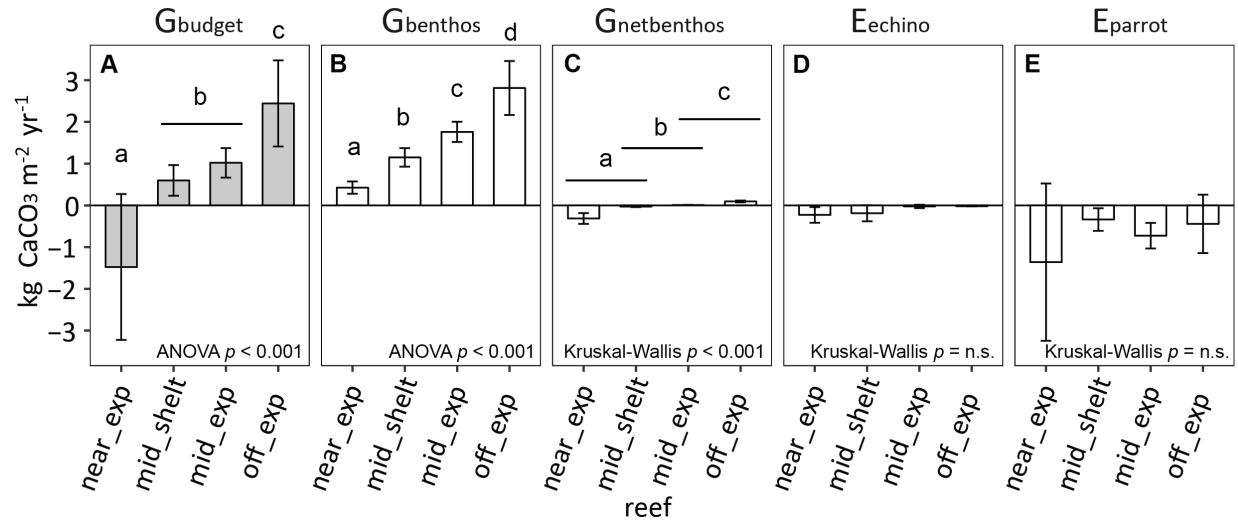

970

971 **Figure 5. Reef carbonate budget estimates and contributing biotic variables along a cross-**  
 972 **shelf gradient in the central Red Sea.** Benthos accretion ( $G_{\text{benthos}}$ ,  $G_{\text{netbenthos}}$ ), and the erosion  
 973 rates of echinoids and parrotfishes ( $E_{\text{echino}}$ ,  $E_{\text{parrot}}$ ) contribute to the total reef carbonate budget  
 974 ( $G_{\text{budget}}$ ) at each reef site. All data are presented as mean  $\pm$  standard deviation. (A)  $G_{\text{budget}}$  and (B  
 975 – E) biotic variables ( $G_{\text{benthos}}$ ,  $G_{\text{netbenthos}}$ ,  $E_{\text{echino}}$ ,  $E_{\text{parrot}}$ ). Letters a – d indicate significant  
 976 differences between the sites. Near\_exp = nearshore exposed, mid\_shelt = midshore sheltered  
 977 (lagoon), mid\_exp = midshore exposed, off\_exp = offshore exposed.
